# Supplementary material
Source: ML conference proceedings conference paper supplement (https://openreview.net/forum?id=HXc5aXeoc8)
Supplement: supplementary_material [file attachment]

# Part I

## Appendices

### Contents

---

|          |                                                                                   |           |
|----------|-----------------------------------------------------------------------------------|-----------|
| <b>A</b> | <b>Frequently Asked Questions</b>                                                 | <b>15</b> |
| <b>B</b> | <b>More Details on Diffusion Modeling and Sampling</b>                            | <b>16</b> |
| B.1      | Diffusion Models and Their Sampling . . . . .                                     | 16        |
| B.2      | Numerical Method Summary . . . . .                                                | 17        |
| B.3      | Guided Diffusion Sampling . . . . .                                               | 17        |
| <b>C</b> | <b>Stability Region of Adam-Bashforth Method</b>                                  | <b>18</b> |
| C.1      | The Boundary Locus Technique . . . . .                                            | 19        |
| <b>D</b> | <b>Derivation of Test Equation</b>                                                | <b>20</b> |
| <b>E</b> | <b>Toy ODE Problem</b>                                                            | <b>21</b> |
| <b>F</b> | <b>Implementation Details of PLMS with HB and GHVB Methods</b>                    | <b>21</b> |
| <b>G</b> | <b>Variance Momentum Methods</b>                                                  | <b>21</b> |
| <b>H</b> | <b>Order of Convergence</b>                                                       | <b>23</b> |
| <b>I</b> | <b>Elaboration on the Order of Convergence Approximation</b>                      | <b>25</b> |
| <b>J</b> | <b>Additional Qualitative Comparisons on Artifacts Mitigation</b>                 | <b>25</b> |
| <b>K</b> | <b>Additional Experiment on ADM</b>                                               | <b>26</b> |
| <b>L</b> | <b>Additional Experiment on DiT</b>                                               | <b>29</b> |
| <b>M</b> | <b>Additional Experiment on Text-to-Image Generation</b>                          | <b>29</b> |
| <b>N</b> | <b>Experiment on MDT</b>                                                          | <b>31</b> |
| <b>O</b> | <b>Experiment on Personalized Image Generation</b>                                | <b>32</b> |
| O.1      | Face-identity Preserving Image Generation . . . . .                               | 32        |
| O.2      | Reference-Only Control Generation . . . . .                                       | 33        |
| <b>P</b> | <b>Factors Contributing to Artifact Occurrence in Fine-tuned Diffusion Models</b> | <b>37</b> |
| <b>Q</b> | <b>Ablation Study on HB Momentum</b>                                              | <b>37</b> |

|          |                                                       |           |
|----------|-------------------------------------------------------|-----------|
| <b>R</b> | <b>Ablation Study on Nesterov Momentum</b>            | <b>42</b> |
| <b>S</b> | <b>Ablation Study on Magnitude Score</b>              | <b>42</b> |
| S.1      | Results with Alternative Parameter Settings . . . . . | 43        |
| S.2      | Results on Alternative Models . . . . .               | 43        |
| <b>T</b> | <b>Statistical Reports</b>                            | <b>43</b> |

## A FREQUENTLY ASKED QUESTIONS

### Q1: What does the term “divergence artifacts” refer to?

In this paper, the term “divergence artifacts” is used to describe visual anomalies that occur when numerical solutions *diverge*, resulting in unusually large magnitudes of the results. In the context of latent-based diffusion, we specifically define divergence artifacts as visual artifacts caused by latent codes with magnitudes that exceed the usual range. These artifacts commonly arise when the stability region of the numerical method fails to handle all eigenvalues of the system, leading to a divergent numerical solution. We demonstrate the connection between high latent magnitudes and these artifacts in Figure 13.

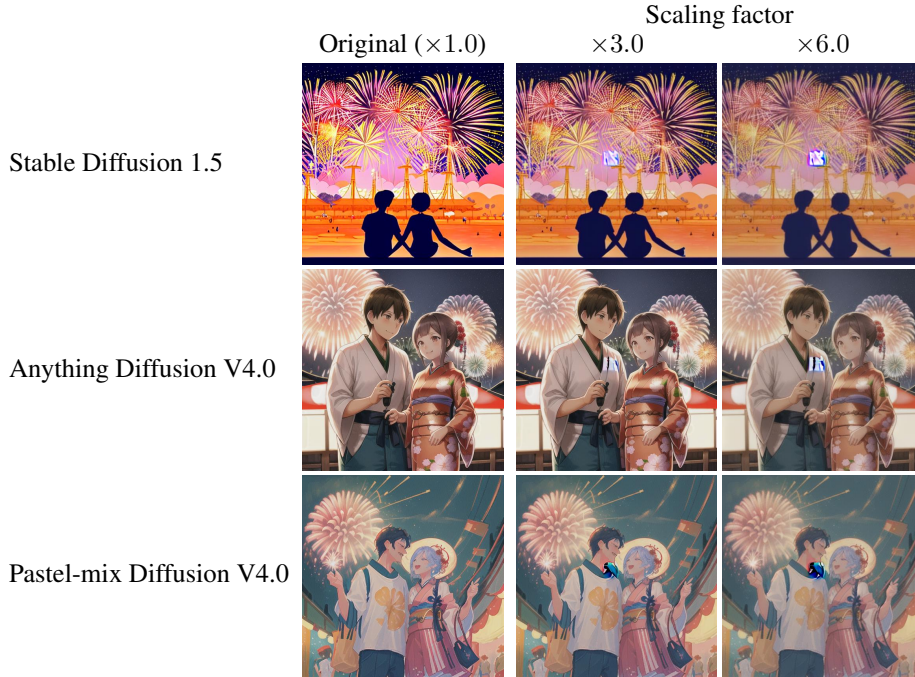

Figure 13: Images generated after multiplying the  $4 \times 4$  square at the center of latent codes with a constant factor. Using higher scaling factors results in more apparent localized divergence artifacts. All samples were generated using PLMS4 (Liu et al., 2022a) with a guidance scale of 15 and 250 sampling steps. Prompt: "A beautiful illustration of a couple looking at fireworks in a summer festival in Japan".

### Q2: How to efficiently determine a suitable solver for diffusion sampling?

Theoretically identifying a solver with optimal accuracy and a stability region that encompasses all  $\delta\lambda$  values is challenging because computing  $\lambda$  from neural networks is intractable. However, given a fixed amount of computational resources (e.g., sampling steps), one can gather information about

$\lambda$  to determine the highest solver’s order without artifacts by first testing Euler’s method with fewer numbers of steps.

In particular, we can determine the lowest sampling step of Euler’s method that does not produce artifacts (e.g., via a binary search), then use its stability region to determine the highest order of GHVB whose stability region encompasses that of Euler’s method. This process does not require additional sampling or evaluating neural networks and can be solved deterministically (Equation 48-51). This strategy is more efficient than directly testing different orders at the target step because Euler’s method usually requires fewer steps than our target step. For instance, we can infer that GHVB3.2 and those with lower orders are applicable at 20 sampling steps by verifying that Euler’s method works at 5 steps.

### Q3: Can we directly interpolate two existing numerical methods instead of using the GHVB method?

Indeed, this is possible. However, the order of the resulting method will be the lowest order of the two methods. To illustrate this point, let us consider a direct interpolation between the 1<sup>st</sup>-order Euler method (AB1) and the 2<sup>nd</sup>-order Adams-Bashford method (AB2), expressed as follows:

$$x_{n+1} = x_n + \delta \left( (1 - \beta)f(x_n) + \beta \frac{3}{2}f(x_n) - \beta \frac{1}{2}f(x_{n-1}) \right) \quad (17)$$

As outlined in Appendix H, despite the orders of the interpolated methods, the resulting method is a 1<sup>st</sup>-order method.

## B MORE DETAILS ON DIFFUSION MODELING AND SAMPLING

This section presents a high-level summary of the theoretical foundation of diffusion models, along with the numerical methods employed in these models. Here, we briefly explain a few concepts that contribute to our method.

### B.1 DIFFUSION MODELS AND THEIR SAMPLING

Assuming that  $x_0$  is a random variable from the data distribution  $q(x_0)$  that we aim to replicate (e.g., the distribution of natural images), diffusion models define a sequence of Gaussian noise degradations of  $x_0$  as random variables  $x_1, x_2, \dots, x_T$ , where

$$x_t \sim q(x_t|x_{t-1}) = \mathcal{N}(\sqrt{1 - \beta_t}x_{t-1}, \beta_t \mathbf{I}) \quad (18)$$

and  $\beta_t \in [0, 1]$  are parameters controlling the noise levels. Utilizing the property of the Gaussian distribution, we express  $x_t$  directly as a function of  $x_0$  and noise  $\epsilon \sim \mathcal{N}(0, \mathbf{I})$  by

$$x_t = \sqrt{\bar{\alpha}_t}x_0 + \sqrt{1 - \bar{\alpha}_t}\epsilon, \quad (19)$$

where  $\bar{\alpha}_t = \prod_{i=1}^t (1 - \beta_i)$ . By selecting a sufficiently large  $T$  (e.g.,  $T = 1,000$ ) and an appropriate set of  $\beta_t$ , we can assume that  $x_T$  follows a standard Gaussian distribution  $\mathcal{N}(0, \mathbf{I})$ .

The main idea of diffusion model generation involves training  $p_\theta(x_{t-1}|x_t)$ , which sequentially reverses  $q(x_t|x_{t-1})$  using a parametric model while setting  $p(x_t) = \mathcal{N}(0, \mathbf{I})$ . Subsequently, we can sample Gaussian noise  $x_T$  and use it to reverse-sample  $x_{T-1}, x_{T-2}, \dots$  until we retrieve  $x_0$ , which belongs to our data distribution.

The Denoising Diffusion Probabilistic Model (DDPM) Ho et al. (2020) outlines the utilization of a neural network denoted as  $\epsilon_\theta(x_t, t)$  to predict the noise  $\epsilon$  used in the computation of  $x_t$  in Equation 19. To facilitate the network’s training, a training image labeled as  $x_0$  is sampled, alongside values for  $t$  and  $\epsilon$ . These provided values are then utilized in computing  $x_t$  using the aforementioned relationship. Consequently, our network  $\epsilon_\theta$  is optimized to minimize the difference between the projected noise and the actual noise:  $\|\epsilon - \epsilon_\theta(x_t, t)\|^2$ . Once training is completed, we can draw samples  $x_{t-1}$  from the conditional distribution  $p_\theta(x_t|x_{t-1})$  given by

$$p_\theta(x_t|x_{t-1}) = \mathcal{N}\left(\mu_\theta(x_{t-1}, t), \frac{1 - \bar{\alpha}_{t-1}}{1 - \bar{\alpha}_t}\mathbf{I}\right), \quad (20)$$

where  $\mu_\theta(x_{t-1}, t) = \frac{1}{\sqrt{\alpha_t}} \left( x_t - \frac{\beta_t}{\sqrt{1-\alpha_t}} \epsilon_\theta(x_t, t) \right)$  and  $x_T \sim p(x_T) = \mathcal{N}(0, \mathbf{I})$ . This step-by-step sampling process is simple but time-consuming. Several sampling techniques and ODE formulations can be employed to accelerate this process. (See Section 2.1.)

Many successful diffusion models Dhariwal & Nichol (2021); Song & Ermon (2020); Song et al. (2020b) consider their target distributions  $q_0(x_0)$  as image distributions, with  $x_t$  directly representing a random variable within the pixel space. These models generate images by inferring networks directly through diffusion sampling. However, direct training of diffusion models within high-resolution pixel space are computationally expensive. To address this, Latent Diffusion Models (LDMs) Rombach et al. (2022) employ a two-stage methodology: Firstly, they employ a trained pair of encoder  $E$  and decoder  $D$  that compress images into smaller spatial latent representations. Secondly, LDMs are then trained on these latent representations  $z = E(x)$ , rather than directly on images  $x$ . Subsequently, the generation of new images involves sampling a latent representation  $z$  from the diffusion model and decoding it into an image using the decoder,  $x = D(z)$ .

## B.2 NUMERICAL METHOD SUMMARY

Many numerical methods can solve Equations 2 and 3 to accelerate diffusion sampling. In the following section, we will summarize the methods mentioned within our papers. Let's denote our ODE as  $\frac{dx}{d\sigma} = f(x)$ , initialized at  $x_0$ .

**Euler's Method** is represented by

$$x_{n+1} = x_n + \delta f(x_n), \quad (21)$$

where  $x_n$  represents the approximate solution, and  $\delta$  represents the step size. This method, when applied to Equation 2 or 3, results in the DDIM formulation Song et al. (2020a).

**Heun's Method** is a 2nd-order extension of Euler's Method given by:

$$x_{n+1} = x_n + \frac{\delta}{2}(e_1 + e_2), \quad (22)$$

Here,  $e_1 = f(x_n)$  and  $e_2 = f(x_n + \delta e_1)$ . This method has been used in various diffusion papers, including Algorithm 1 in Karras et al. (2022) and DPM-Solver-2 in Lu et al. (2022a), and also serves as the simplest form of Predictor-Corrector methods in Song et al. (2020b); Zhao et al. (2023).

**Adams-Bashforth (AB) Methods** is a family of methods utilizing previous steps to estimate the next step, also known as linear multi-step methods. The formulations are as follows:

**1<sup>st</sup>-order** (same as Euler's method):

$$x_{n+1} = x_n + \delta f(x_n), \quad (23)$$

**2<sup>nd</sup>-order:**

$$x_{n+1} = x_n + \frac{\delta}{2}(3e_0 - e_1), \quad (24)$$

**3<sup>rd</sup>-order:**

$$x_{n+1} = x_n + \frac{\delta}{12}(23e_0 - 16e_1 + 5e_2), \quad (25)$$

**4<sup>th</sup>-order:**

$$x_{n+1} = x_n + \frac{\delta}{24}(55e_0 - 59e_1 + 37e_2 - 9e_3), \quad (26)$$

where  $e_k = f(x_{n-k})$ . Notably, DPM-Solver++ Lu et al. (2022b) applies the 2<sup>nd</sup>-order AB method to ODE (3), while PLMS4 Liu et al. (2022a) utilizes the 4<sup>th</sup>-order AB method on ODE (2).

## B.3 GUIDED DIFFUSION SAMPLING

Guided diffusion sampling is widely used in conditional sampling, such as text-to-image and class-to-image generation. There are main two approaches for guided sampling:

**Classifier guidance** (Dhariwal & Nichol, 2021; Song et al., 2020a) uses a pre-trained classifier model  $p_\phi(c | x_t, t)$  to define the conditional noise prediction model at inference time:

$$\hat{\epsilon}(x_t, t | c) = \epsilon_\theta(x_t, t) - s \nabla \log p_\theta(c | x_t, t), \quad (27)$$

where  $s > 0$  is a ‘‘guidance’’ scale. The model can be extended to accept any guidance function, such as CLIP function (Radford et al., 2021) for text-to-image generation (Letts et al., 2021). This approach only modifies the sampling equation at inference time and thus can be applied to a trained diffusion model without retraining.

**Classifier-free guidance** (Ho & Salimans, 2021) trains a conditional noise model  $\epsilon_\theta(x_t, t | c)$  to generate data samples with the label  $c$ :

$$\hat{\epsilon}(x_t, t | c) = \epsilon_\theta(x_t, t | \phi) + s(\epsilon_\theta(x_t, t | c) - \epsilon_\theta(x_t, t | \phi)), \quad (28)$$

where  $\phi$  is a null label to allow for unconditional sampling. The sampling equations in both approaches can be expressed as a ‘‘guided ODE’’ of the form

$$\frac{d\bar{x}}{d\sigma} = \bar{\epsilon}(\bar{x}, \sigma) + g(\bar{x}, \sigma), \quad (29)$$

where  $g(\bar{x}, \sigma)$  represents a guidance function. To accelerate guided diffusion sampling, splitting numerical methods have been proposed by Wizarwongsa & Suwajanakorn (2023), such as Lie-Trotter Splitting (LTSP) divides Equation 29 into two subproblems, i)  $\frac{dy}{d\sigma} = \bar{\epsilon}(y, \sigma)$  and ii)  $\frac{dz}{d\sigma} = g(z, \sigma)$ , but only apply high-order numerical methods to the first equation while resorting to the Euler method for the second equation to avoid numerical instability. Higher-order splitting methods, such as Strang Splitting (STSP), can also mitigate artifacts. However, these methods require solving the second equation twice per step, which is comparable to increasing the total sampling step to avoid artifacts. Both approaches require non-negligible computation.

## C STABILITY REGION OF ADAM-BASHFORTH METHOD

To investigate the stability of the AB2 method, we apply AB2 to the test equation  $x' = \lambda x$ , which was also used with the Euler method (Section 2.2). We have  $x_{n+1} = x_n + \delta \left( \frac{3}{2}\lambda x_n - \frac{1}{2}\lambda x_{n-1} \right)$ . To solve this linear recurrence relation, we substitute  $x_n = r^n$  into the formula, where  $r$  is a complex constant. Simplifying the resulting equation, we obtain the characteristic equation:

$$r^2 - \left( 1 + \frac{3}{2}\delta\lambda \right) r + \frac{1}{2}\delta\lambda = 0, \quad (30)$$

which has the solutions

$$r_1 = \frac{1}{2} \left( 1 + \frac{3}{2}\delta\lambda + \sqrt{\left( 1 + \frac{3}{2}\delta\lambda \right)^2 - 2\delta\lambda} \right), \quad (31)$$

$$r_2 = \frac{1}{2} \left( 1 + \frac{3}{2}\delta\lambda - \sqrt{\left( 1 + \frac{3}{2}\delta\lambda \right)^2 - 2\delta\lambda} \right). \quad (32)$$

The general formulation of  $x_n$  can be expressed as

$$x_n = a_1 r_1^n + a_2 r_2^n, \quad (33)$$

where  $a_1$  and  $a_2$  are constants. The numerical solution  $x_n$  tends to 0 as  $n$  tends to infinity when both  $|r_1| < 1$  and  $|r_2| < 1$ , which means the stability region of AB2 is determined by the complex region

$$S = \left\{ z \in \mathbb{C} : \left| \frac{1}{2} \left( 1 + \frac{3}{2}z \pm \sqrt{\left( 1 + \frac{3}{2}z \right)^2 - 2z} \right) \right| \leq 1 \right\}. \quad (34)$$

Solving for the complex area from the roots of the characteristic equation can pose significant challenges in numerical analysis. One commonly employed graphical technique to visualize the stability region is the boundary locus technique (Lambert et al., 1991).

### C.1 THE BOUNDARY LOCUS TECHNIQUE

The boundary locus technique begins by defining the shift operator  $E$  such that  $Ex_k = x_{k-1}$ . Note that  $E^2x_k = Ex_{k-1} = x_{k-2}$ . Generally, a numerical method can be represented in the following form:

$$A(E)x_n = \delta B(E)f(x_n), \quad (35)$$

where  $A$  and  $B$  are polynomials of  $E$ . For example, in the case of the AB2 method, we have  $A(E) = 1 - E$  and  $B(E) = \frac{3}{2}E - \frac{1}{2}E^2$ .

To determine the stability region of a numerical method, we apply the boundary locus technique to the general form given by Equation 35. The characteristic equation of the method can be obtained by substituting  $f(x_n) = \lambda x_n$  (i.e., the test equation) and  $x_n = r^n$ , which yields

$$A(r^{-1}) = \delta \lambda B(r^{-1}), \quad (36)$$

where  $r$  is the root of the method's characteristic equation. The stability region of the method is the area in the complex plane where the characteristic root  $r$  have modulus less than 1. The boundary of the stability region can be determined by substituting  $r$  with a modulus of 1 (which means that  $r = e^{i\theta}$  for some real value  $\theta$ ) into the characteristic equation and solving for  $z = \delta\lambda$ . This yields the locus of points in the complex plane where the characteristic roots of the method are on the boundary of the stability region. Specifically, we can obtain the curve  $z = s(\theta) = A(e^{-i\theta})/B(e^{-i\theta})$ , where  $\theta \in [-\pi, \pi]$ , that represents the boundary of the stability region in the complex plane. By comparing the stability regions of different numerical methods, we can determine which method is more stable and accurate for a given problem. The boundary locus technique provides a powerful tool for analyzing the stability of numerical methods and can help guide the selection of appropriate methods for solving ODE problems.

**Example C.1.** (Euler Method) The Euler method, a numerical technique for approximating solutions of ODE, can be expressed as:

$$(1 - E)x_n = \delta E f(x_n) \quad (37)$$

The associated polynomials for this method are:

$$A(z) = 1 - z, \quad B(z) = z \quad (38)$$

The stability region of the Euler method corresponds to the locus curve in which the solution remains bounded. This region can be determined by evaluating the complex function:

$$s(\theta) = \frac{A(e^{-i\theta})}{B(e^{-i\theta})} = \frac{1 - e^{-i\theta}}{e^{-i\theta}} = e^{i\theta} - 1, \quad \theta \in [-\pi, \pi]. \quad (39)$$

The locus curve forms a perfect circle with a radius of 1 and a center at -1.

**Example C.2.** (AB Methods) The 2<sup>nd</sup>-order Adams-Bashforth (AB2) method is given by:

$$(1 - E)x_n = \delta \left( \frac{3}{2}E - \frac{1}{2}E^2 \right) f(x_n). \quad (40)$$

The locus curve representing the stability region of this method is given by:

$$s(\theta) = \frac{1 - e^{-i\theta}}{\frac{3}{2}e^{-i\theta} - \frac{1}{2}e^{-2i\theta}} = \frac{2(1 - e^{-i\theta})}{3e^{-i\theta} - e^{-2i\theta}}, \quad \theta \in [-\pi, \pi]. \quad (41)$$

Similarly, the stability regions for the AB3 and AB4 methods can be obtained by evaluating the complex functions:

$$s(\theta) = \frac{12(1 - e^{-i\theta})}{23e^{-i\theta} - 16e^{-2i\theta} + 5e^{-3i\theta}}, \quad \theta \in [-\pi, \pi]. \quad (42)$$

$$s(\theta) = \frac{24(1 - e^{-i\theta})}{55e^{-i\theta} - 59e^{-2i\theta} + 37e^{-3i\theta} - 9e^{-4i\theta}}, \quad \theta \in [-\pi, \pi]. \quad (43)$$

The locus curves for the boundary of stability regions of the first four AB methods are visualized in Figure 2.

Additionally, we include the locus curves for the boundaries of the stability regions of our techniques. As shown in Figure 4, the local curves for the PLMS method with HB  $\beta$  are given by:

**PLMS1 with HB  $\beta$ :**

$$s(\theta) = \frac{(1 - e^{-i\theta})(1 - (1 - \beta)e^{-i\theta})}{\beta e^{-i\theta}} \quad (44)$$

**PLMS2 with HB  $\beta$ :**

$$s(\theta) = \frac{2(1 - e^{-i\theta})(1 - (1 - \beta)e^{-i\theta})}{\beta(3e^{-i\theta} - e^{-2i\theta})} \quad (45)$$

**PLMS3 with HB  $\beta$ :**

$$s(\theta) = \frac{12(1 - e^{-i\theta})(1 - (1 - \beta)e^{-i\theta})}{\beta(23e^{-i\theta} - 16e^{-2i\theta} + 5e^{-3i\theta})} \quad (46)$$

**PLMS4 with HB  $\beta$ :**

$$s(\theta) = \frac{24(1 - e^{-i\theta})(1 - (1 - \beta)e^{-i\theta})}{\beta(55e^{-i\theta} - 59e^{-2i\theta} + 37e^{-3i\theta} - 9e^{-4i\theta})} \quad (47)$$

Similarly, the local curves for the GHVB method in Figure 6 are given by:

**1<sup>st</sup>-order GHVB (equivalent to PLMS1 with HB):**

$$s(\theta) = \frac{(1 - e^{-i\theta})(1 - (1 - \beta)e^{-i\theta})}{\beta e^{-i\theta}} \quad (48)$$

**2<sup>nd</sup>-order GHVB:**

$$s(\theta) = \frac{2(1 - e^{-i\theta})(1 - (1 - \beta)e^{-i\theta})}{((2 + \beta)e^{-i\theta} - (2 - \beta)e^{-2i\theta})} \quad (49)$$

**3<sup>rd</sup>-order GHVB:**

$$s(\theta) = \frac{12(1 - e^{-i\theta})(1 - (1 - \beta)e^{-i\theta})}{(18 + 5\beta)e^{-i\theta} - (24 - 8\beta)e^{-2i\theta} + (6 - \beta)e^{-3i\theta}} \quad (50)$$

**4<sup>th</sup>-order GHVB:**

$$s(\theta) = \frac{24(1 - e^{-i\theta})(1 - (1 - \beta)e^{-i\theta})}{(46 + 9\beta)e^{-i\theta} - (78 - 19\beta)e^{-2i\theta} + (42 - 5\beta)e^{-3i\theta} - (10 - \beta)e^{-4i\theta}} \quad (51)$$

## D DERIVATION OF TEST EQUATION

This section presents the derivation of the test equation  $u' = \lambda u$ , which serves as a fundamental tool for analyzing the stability of numerical methods in diffusion sampling, as discussed in Section 3.2.

Starting from the differential equation for  $\bar{x}$ , we have

$$\frac{d\bar{x}}{d\sigma} = \nabla \bar{\epsilon}(x^*)(\bar{x} - x^*). \quad (52)$$

We then define  $u = v^T(\bar{x} - x^*)$ , where  $v$  is a normalized eigenvector of  $\nabla \bar{\epsilon}(x^*)^T$  corresponding to the eigenvalue  $\lambda$ . Taking the derivative of  $u$  with respect to  $\sigma$  and using the chain rule, we have:

$$\frac{du}{d\sigma} = v^T \frac{d}{d\sigma}(\bar{x} - x^*) = v^T [\nabla \bar{\epsilon}(x^*)](\bar{x} - x^*) \quad (53)$$

$$= [\nabla \bar{\epsilon}(x^*)^T v]^T (\bar{x} - x^*) = (\lambda v)^T (\bar{x} - x^*) \quad (54)$$

$$= \lambda u \quad (55)$$

Thus, we obtain the test equation  $u' = \lambda u$ .

## E TOY ODE PROBLEM

This section aims to demonstrate how the solutions yielded by numerical methods can diverge when the stability regions of the methods are too small. Additionally, we illustrate how our momentum-based techniques can enlarge the stability region. The demonstration is conducted on a 2D toy ODE problem given by:

$$\frac{dx}{dt} = \begin{bmatrix} 0 & 1 \\ -9 & -10 \end{bmatrix} \begin{bmatrix} x_1 \\ x_2 \end{bmatrix}, \quad x(0) = \begin{bmatrix} -1 \\ 0 \end{bmatrix}. \quad (56)$$

The eigenvalues of the  $2 \times 2$  matrix are  $-9$  and  $-1$ , and the exact solution of Equation 56 is given by:

$$x(t) = \frac{1}{8} \begin{bmatrix} 1 \\ -9 \end{bmatrix} e^{-9t} + \frac{9}{8} \begin{bmatrix} -1 \\ 1 \end{bmatrix} e^{-t}. \quad (57)$$

As  $t$  increases,  $x(t)$  converges to the origin.

Let us say we want to numerically compute  $x(3)$  by integrating the ODE for 26 steps with a numerical method. We divide the time interval  $[0, 3]$  into 26 equal intervals, resulting in a step size of  $\delta = 3/26$ . For this particular setting, it turns out that the 2<sup>nd</sup>-order Adams-Bashforth (AB2) method diverges, but the Euler method converges. To see this, observe that the stability region of the AB2 method only cover the interval  $[-1, 0]$  of the real line, as depicted in Figures 14b and 14d. So, for the eigenvalue  $\lambda = -9$ , the product  $\delta\lambda = -27/26$  lies just outside the region. Consequently, the numerical solution yielded by AB2 diverges, as indicated by the blue line in Figures 14a and 14c. In contrast, the Euler method’s stability region contains both values of  $\delta\lambda$ , and the numerical solution, represented by the green line in Figures 14a and 14c, appears to be more accurate.

We can improve the stability from AB2 method by applying any of our proposed techniques: Heavy Ball momentum (HB) and GHVB. The stability regions of the modified AB2 methods are given by the red ( $\beta = 0.8$ ) and yellow ( $\beta = 0.9$ ) lines in Figures 14b and 14d. Observe that they contain the points associated with the  $\lambda\delta$  values. As a result, the numerical solutions of the modified methods converge to the origin, as demonstrated by the red and yellow lines in Figures 14a and 14c, respectively.

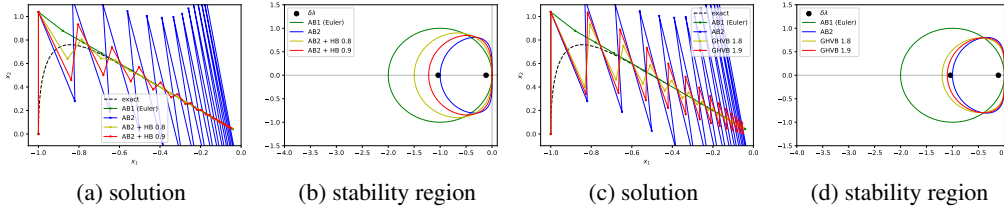

Figure 14: Comparison of solution trajectories and stability regions of various numerical methods when applied to the toy ODE problem. Here, we seek to compute  $x(3)$  in 26 steps with the Euler method, the AB2 method, and methods resulting from modifying AB2 with our momentum-based techniques. Subfigure (a) presents the numerical solutions obtained using our modified AB2 method with HB momentum, while subfigure (c) showcases those obtained using our GHVB. The stability regions of the methods are depicted in subfigures (b) and (d) respectively.

## F IMPLEMENTATION DETAILS OF PLMS WITH HB AND GHVB METHODS

In this section, we present the complete algorithms for the PLMS method with the HB momentum and the GHVB method in Algorithm 1 and Algorithm 2, respectively.

## G VARIANCE MOMENTUM METHODS

In 2018, a variant of Polyak’s HB momentum called aggregated momentum (Lucas et al., 2018) was proposed. Its objective is to enhance stability while also offering convergence advantages.

**Algorithm 1:** PLMS step with HB momentum

---

**input:**  $\bar{x}_n$  (previous result),  $\delta$  (step size),  
 $\{e_i\}_{i < n}$  (evaluation buffer),  $r$  (method order),  
 $v_n$  (previous velocity) ;  
 $e_n = \bar{e}_\sigma(\bar{x}_n)$  ;  
 $c = \min(r, n)$  ;  
**if**  $c == 1$  **then**  
 $\hat{e} = e_n$  ;  
**else if**  $c == 2$  **then**  
 $\hat{e} = (3e_n - e_{n-1})/2$  ;  
**else if**  $c == 3$  **then**  
 $\hat{e} = (23e_n - 16e_{n-1} + 5e_{n-2})/12$  ;  
**else**  
 $\hat{e} = (55e_n - 59e_{n-1} + 37e_{n-2} - 9e_{n-3})/24$  ;  
 $v_{n+1} = (1 - \beta)v_n + \beta\hat{e}$  ;  
**Result:**  $\bar{x}_n + \delta v_{n+1}$

---

**Algorithm 2:** GHVB step

---

**input:**  $\bar{x}_n$  (previous result),  $\delta$  (step size),  $\beta$  (damping parameter)  
 $\{v_i\}_{i \leq n}$  (evaluation buffer),  $r$  (method order), ;  
 $v_{n+1} = (1 - \beta)v_n + \beta\bar{e}_\sigma(\bar{x}_n)$  ;  
 $c = \min(r, n)$  ;  
**if**  $c == 1$  **then**  
 $\hat{e} = v_{n+1}$  ;  
**else if**  $c == 2$  **then**  
 $\hat{e} = ((2 + \beta)v_{n+1} - (2 - \beta)v_n)/2\beta$  ;  
**else if**  $c == 3$  **then**  
 $\hat{e} = ((18 + 5\beta)v_{n+1} - (24 - 8\beta)v_n + (6 - \beta)v_{n-1})/12\beta$  ;  
**else if**  $c == 4$  **then**  
 $\hat{e} = ((46 + 9\beta)v_{n+1} - (78 - 19\beta)v_n + (42 - 5\beta)v_{n-1} - (10 - \beta)v_{n-2})/24\beta$  ;  
**else**  
 $\hat{e} = ((1650 + 251\beta)v_{n+1} - (3420 - 646\beta)v_n + (2880 - 264\beta)v_{n-1} - (1380 - 106\beta)v_{n-2} + (270 - 19\beta)v_{n-3})/720\beta$  ;  
**Result:**  $\bar{x}_n + \delta\hat{e}$

---

This modification introduces multiple velocities, denoted by  $v_n^{(i)}$ , each associated with its specific damping coefficient  $\beta^{(i)}$ .

$$v_{n+1}^{(i)} = (1 - \beta^{(i)})v_n^{(i)} + \beta^{(i)}f(x_n), \quad x_{n+1} = x_n + \delta \sum_{i=1}^K w^{(i)}v_{n+1}^{(i)} \quad (58)$$

Nesterov's momentum (Nesterov, 1983) is one version of the classic momentum that can also be applied to diffusion sampling processes to improve stability. It can be written as follows:

$$y_{n+1} = x_n + \delta\beta f(x_n), \quad x_{n+1} = y_{n+1} + (1 - \beta)(y_{n+1} - y_n) \quad (59)$$

In fact, Nesterov's momentum can be obtained from aggregated momentum by considering the following:

$$v_{n+1}^{(1)} = (1 - \beta)v_n^{(1)} + \beta f(x_n), \quad v_{n+1}^{(2)} = f(x_n), \\ x_{n+1} = x_n + \delta((1 - \beta)v_{n+1}^{(1)} + \beta v_{n+1}^{(2)}). \quad (60)$$

The stability regions of Nesterov's momentum when applied to the Euler method and high-order Adams-Bashforth methods are illustrated in Figures 15a through 15d. Observe that the stability

regions of methods with Nesterov’s momentum become larger in a similar manner to those with Polyak’s HB momentum. However, the enlargement due to Nesterov’s momentum is more pronounced in the vertical direction, while the Polyak’s HB momentum’s enlargement is more horizontal in nature. (See Figures 14b and 14d) The differences in the shapes of the stability regions suggest one type of momentum is more suitable to certain ODE problems than the other.

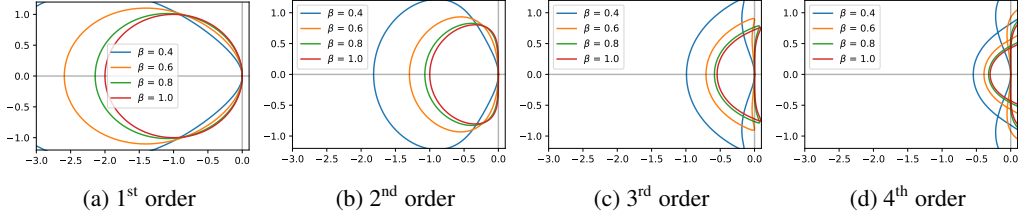

Figure 15: Comparison of stability regions for different methods with different levels of Nesterov’s momentum.

While generalizing the aggregated momentum method to higher-order methods is possible, it is no longer as straightforward as it is with the HB method. As an example, we will consider the 2<sup>nd</sup>-order generalization of Nesterov’s momentum method.

We begin by noting that  $(\beta + (1 - \beta)\Delta)v_{n+1} = \beta f(x_n)$ . Our goal is to find polynomials  $B$  and  $C$  such that

$$\Delta x_{n+1} = \delta(B(\Delta)v_{n+1} + C(\Delta)f(x_n)). \quad (61)$$

Multiplying both sides of the equation by  $(\beta + (1 - \beta)\Delta)$ , we get

$$(\beta + (1 - \beta)\Delta)\Delta x_{n+1} = \delta(\beta B(\Delta)f(x_n) + (\beta + (1 - \beta)\Delta)C(\Delta)f(x_n)). \quad (62)$$

Replace the left side with the first two terms from Equation 13, we obtain

$$\delta \left( \beta + \frac{2 + \beta}{2} \Delta \right) f(x_n) = \delta(\beta B(\Delta) + (\beta + (1 - \beta)\Delta)C(\Delta))f(x_n). \quad (63)$$

Let  $B(\Delta) = b_0 + b_1\Delta$  and  $C(\Delta) = c_0$ . Then, by balancing the coefficients of  $\Delta$  on both sides, we have  $1 = b_0 + c_0$  and  $\frac{2+\beta}{2} = \beta b_1 + (1 - \beta)c_0$ . We can now write the final formulation as follows:

$$x_{n+1} = x_n + \delta(b_0 v_{n+1} + b_1(v_{n+1} - v_n) + c_0 f(x_n)). \quad (64)$$

This suggests that there are countless different ways to expand the stability region of a numerical method, which offer many new research opportunities.

## H ORDER OF CONVERGENCE

When solving ODEs numerically, it is important to consider the accuracy of the method used. One way to measure accuracy is by considering the order method’s of convergence of the. Suppose we have a numerical method of the form

$$A(E)x_n = \delta B(E)f(x_n), \quad (65)$$

where  $A(E) = a_0 + a_1E + a_2E^2 + \dots + a_sE^s$  and  $B(E) = b_0 + b_1E + \dots + b_sE^s$ . The method is said to be of  $p^{th}$  order if and only if, for all sufficiently smooth functions  $x$ , we have that

$$\sum_{m=0}^s a_m x(\sigma - m\delta) - \delta \sum_{m=0}^s b_m x'(\sigma - m\delta) = \mathcal{O}(\delta^{p+1}), \quad (66)$$

where  $x'$  denotes the derivative of  $x$ .

To derive the order of convergence, we use Taylor expansion for both  $x$  and  $x'$ , yielding

$$\begin{aligned}
\text{L.H.S.} &= \sum_{m=0}^s a_m \sum_{k=0}^{\infty} \frac{(-m\delta)^k}{k!} x^{(k)}(\sigma) - \delta \sum_{m=0}^s b_m \sum_{k=0}^{\infty} \frac{(-m\delta)^k}{k!} x^{(k+1)}(\sigma) \\
&= \sum_{k=0}^{\infty} \left( \sum_{m=0}^s a_m \frac{(-m\delta)^k}{k!} \right) x^{(k)}(\sigma) - \delta \sum_{k=0}^{\infty} \left( \sum_{m=0}^s b_m \frac{(-m\delta)^k}{k!} \right) x^{(k+1)}(\sigma) \\
&= \sum_{k=0}^{\infty} \left( \sum_{m=0}^s a_m \frac{(-m\delta)^k}{k!} \right) x^{(k)}(\sigma) + \sum_{k=1}^{\infty} \left( \sum_{m=0}^s b_m \frac{m^{k-1}(-\delta)^k}{(k-1)!} \right) x^{(k)}(\sigma) \\
&= \sum_{m=0}^s a_m + \sum_{k=1}^{\infty} \left( \sum_{m=0}^s a_m \frac{m^k}{k!} + \sum_{m=0}^s b_m \frac{m^{k-1}}{(k-1)!} \right) x^{(k)}(\sigma) (-\delta)^k
\end{aligned}$$

where  $x^{(k)}(\sigma)$  denotes the  $k^{\text{th}}$  derivative of  $x$  evaluated at  $\sigma$ .

Therefore, the method has  $p^{\text{th}}$  order of convergence if and only if the coefficients satisfy the conditions given by

$$\begin{aligned}
&\sum_{m=0}^s a_m = 0, \\
&\sum_{m=0}^s a_m \frac{m^k}{k!} + \sum_{m=0}^s b_m \frac{m^{k-1}}{(k-1)!} = 0, \quad k = 0, 1, \dots, p.
\end{aligned} \tag{67}$$

Now, we discuss the convergence order of any numerical method after HB momentum is applied to it. An example of such an algorithm is the modified PLMS method, presented in Algorithm 1.

**Theorem 1** (Convergence order of numerical methods with HB momentum). *Suppose that a  $p^{\text{th}}$ -order numerical method has the form  $x_{n+1} = x_n + \delta \sum_{m=0}^s b_m f(x_{n-m})$ , where  $p \geq 1$ . The modified method that uses HB momentum can be expressed as follows:*

$$v_{n+1} = (1 - \beta)v_n + \beta \sum_{m=0}^s b_m f(x_{n-m}), \tag{68}$$

$$x_{n+1} = x_n + \delta v_{n+1}. \tag{69}$$

*It has first-order convergence.*

*Proof.* From the condition given in 67, it follows that  $\sum_{m=0}^s b_m = 1$ . We can rewrite these equations as:

$$x_{n+1} - x_n - (1 - \beta)(x_n - x_{n-1}) = \delta \beta \sum_{m=0}^s b_m f(x_{n-m}). \tag{70}$$

To estimate the order of the modified method, we evaluate Equation 70 and obtain:

$$\begin{aligned}
&\sum_{m=0}^s a_m = 1 - 1 - (1 - \beta)(1 - 1) = 0, \\
&\sum_{m=0}^s a_m \frac{m^1}{1!} + \sum_{m=0}^s b_m \frac{m^0}{0!} = 0 - 1 - (1 - \beta)(1 - 2) + \beta \sum_{m=0}^s b_m \\
&\quad = -\beta + \beta = 0.
\end{aligned} \tag{72}$$

Therefore, we have shown that the modification to the method has first-order convergence.  $\square$

Next, we turn our attention to the GHVB method.

**Theorem 2** (Convergence order of the GHVB method). *The  $r^{\text{th}}$ -order GHVB (Algorithm 2) has order of convergence of  $r$ .*

*Proof.* We will use the 2<sup>nd</sup>-order method as an example. Using Equation 16, we can write an equivalent equation as:

$$x_{n+1} - x_n - (1 - \beta)(x_n - x_{n-1}) = \delta \left( \frac{2 + \beta}{2} f(x_n) - \frac{2 - \beta}{2} f(x_{n-1}) \right). \quad (73)$$

To estimate the order of the modified method, we evaluate Equation 70 and obtain:

$$\begin{aligned} \sum_{m=0}^s a_m &= 1 - 1 - (1 - \beta)(1 - 1) = 0, \\ \sum_{m=0}^s a_m \frac{m^1}{1!} + \sum_{m=0}^s b_m \frac{m^0}{0!} &= 0 - 1 - (1 - \beta)(1 - 2) + \left( \frac{2 + \beta}{2} - \frac{2 - \beta}{2} \right) = 0, \\ \sum_{m=0}^s a_m \frac{m^2}{2!} + \sum_{m=0}^s b_m \frac{m^1}{1!} &= \frac{1}{2}(0 - 1^2 - (1 - \beta)(1^2 - 2^2)) + \left( \frac{2 + \beta}{2} 1^1 - \frac{2 - \beta}{2} 2^1 \right) \\ &= \frac{2 - 3\beta}{2} - \frac{2 - 3\beta}{2} = 0. \end{aligned}$$

Thus, the method has a convergence order of two. Methods of other orders can be dealt with in a similar fashion.  $\square$

## I ELABORATION ON THE ORDER OF CONVERGENCE APPROXIMATION

In Appendix H, we explored the theoretical aspects of the order of convergence for numerical methods. In this section, we will delve into the estimation of the order of convergence specifically for GHVB in Section 4.2.

To assess the order of convergence, we focus on the error  $e$ , referred to as the global truncation error. This error is quantified by measuring the absolute difference in the latent space between the numerical solution and an approximate exact solution obtained through 1,000-step DDIM sampling. The order of convergence for a numerical method is defined as  $q$ , where the error  $e$  follows the relationship  $e = \mathcal{O}(\delta^q)$ , with  $\delta$  representing the step size.

To estimate the order of convergence practically, we adopt a straightforward approach. It involves selecting two distinct step sizes, denoted as  $\delta_{\text{new}}$  and  $\delta_{\text{old}}$ , and computing the corresponding errors  $e_{\text{new}}$  and  $e_{\text{old}}$ . These errors can be approximated using the following formulas:

$$e_{\text{new}} \approx C_{\text{new}}(\delta_{\text{new}})^q, \quad e_{\text{old}} \approx C_{\text{old}}(\delta_{\text{old}})^q \quad (74)$$

Here, we make the assumption that  $C_{\text{new}}$  is approximately equal to  $C_{\text{old}}$ . By taking the ratio of  $e_{\text{new}}$  to  $e_{\text{old}}$ , we obtain:

$$\frac{e_{\text{new}}}{e_{\text{old}}} \approx \left( \frac{\delta_{\text{new}}}{\delta_{\text{old}}} \right)^q \quad (75)$$

Consequently, we can estimate the order of convergence, denoted as  $q$ , by evaluating the logarithmic ratio of errors and step sizes:

$$q \approx \frac{\log(e_{\text{new}}/e_{\text{old}})}{\log(\delta_{\text{new}}/\delta_{\text{old}})} \quad (76)$$

In our investigation of GHVB in Section 4.2, we conducted sampling experiments using 20, 40, 80, 160, 320, and 640 steps. This choice of an exponential sequence for the number of steps was intentional, as it allowed us to approximate  $\delta_{\text{new}}/\delta_{\text{old}} \approx 1/2$ . By doing so, we facilitated the estimation process. The results, representing the approximated order of convergence for GHVB, are visually depicted in Figure 12.

## J ADDITIONAL QUALITATIVE COMPARISONS ON ARTIFACTS MITIGATION

Figure 1 compares our momentum-based methods, HB and GHVB, with two different diffusion solver methods, DPM-Solver++ (Lu et al., 2022b) and PLMS4 (Liu et al., 2022a), without momentum. The number of sampling steps is held constant while varying the guidance scale  $s$  to

intentionally induce divergence artifacts. (Note that the guidance scales that yield such artifacts are different between diffusion models.) The figure demonstrates that, under the difficult settings of low step counts and high guidance scales where the baseline methods produce artifacts, our proposed techniques can successfully eliminate them.

We present additional qualitative results to show the effect of the damping parameter  $\beta$  on the quality of images generated by methods modified with HB momentum. We use methods of varying orders, including DPLM-Solver++ (Lu et al., 2022b), UniPC (Zhao et al., 2023), and PLMS4 (Liu et al., 2022a). The diffusion models utilized in our analysis are Realistic Vision v2.0<sup>1</sup>, Anything Diffusion v4.0<sup>2</sup>, Counterfeit Diffusion V2.5<sup>3</sup>, Pastel-Mix<sup>4</sup>, Deliberate Diffusion<sup>5</sup>, and Dreamlink Diffusion V1.0<sup>6</sup>. The results are shown in Figure 16. Notice that stronger momentum (lower  $\beta$ ) leads to fewer and less severe artifacts.

## K ADDITIONAL EXPERIMENT ON ADM

We present additional details and results for the ADM experiment in Section 5.2. The primary objective of this experiment was to provide a quantitative evaluation of class-conditional diffusion sampling in the context of pixel-based images. The experiment was conducted using the pre-trained diffusion and classifier model at the following link: <sup>7</sup>. The implementation used in our experiment was obtained directly from the official DPM-Solver GitHub repository <sup>8</sup>.

To enhance the capabilities of DPM-Solver++, we incorporated HB momentum into DPM-Solver++ (just change a few lines of code) and implemented the splitting method LTSP both with and without HB momentum into the DPM-Solver code for comparative purposes. The experiment was done on four NVIDIA RTX A4000 GPUs and a 24-core AMD Threadripper 3960x CPU.

The results of the experiment, as measured by the full FID score, are presented in Table 1 (as well as in Figure 9). Our technique is highlighted in grey within the table, while the best FID score for each number of steps is indicated in bold. Additionally, Figure 17 showcases sample images from this experiment. As this experiment uses pixel-based diffusion models, the observed divergence artifacts differ from those in latent-based diffusion models. Specifically, the artifacts may display excessive brightness or darkness caused by pixel values nearing the maximum or minimum thresholds.

| Method                 | Number of Steps |              |              |              |              |              |              |              |
|------------------------|-----------------|--------------|--------------|--------------|--------------|--------------|--------------|--------------|
|                        | 10              | 12           | 14           | 16           | 18           | 20           | 25           | 30           |
| DPM-Solver++           | 66.77           | 46.77        | 34.56        | 26.97        | 21.87        | 19.48        | 16.31        | 15.63        |
| DPM-Solver++ w/ HB 0.8 | 47.10           | 33.65        | 25.61        | 21.42        | 18.94        | 17.76        | 15.98        | 15.53        |
| LTSP [PLMS4, PLMS1]    | 45.32           | 34.08        | 26.58        | 21.54        | 18.54        | 17.15        | <b>15.79</b> | <b>15.51</b> |
| LTSP [PLMS4, GHVB 0.8] | <b>37.43</b>    | <b>29.74</b> | <b>23.60</b> | <b>20.23</b> | <b>18.46</b> | <b>17.14</b> | 16.07        | 15.79        |

Table 1: FID scores on classifier-guidance ADM models

<sup>1</sup>[https://huggingface.co/SG161222/Realistic\\_Vision\\_V2.0](https://huggingface.co/SG161222/Realistic_Vision_V2.0)

<sup>2</sup><https://huggingface.co/andite/anything-v4.0>

<sup>3</sup><https://huggingface.co/gsd/Counterfeit-V2.5>

<sup>4</sup><https://huggingface.co/andite/pastel-mix>

<sup>5</sup><https://huggingface.co/XpucT/Deliberate>

<sup>6</sup><https://huggingface.co/dreamlike-art/dreamlike-diffusion-1.0>

<sup>7</sup><https://github.com/openai/guided-diffusion>

<sup>8</sup><https://github.com/LuChengTHU/dpm-solver>

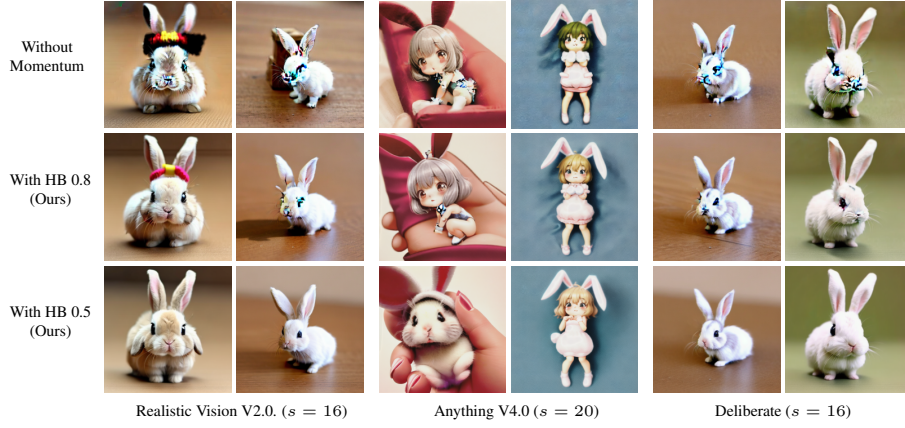(a) DPM-Solver++(2M) using 15 steps and guidance scale  $s$ . Prompt: “a tiny cute bunny”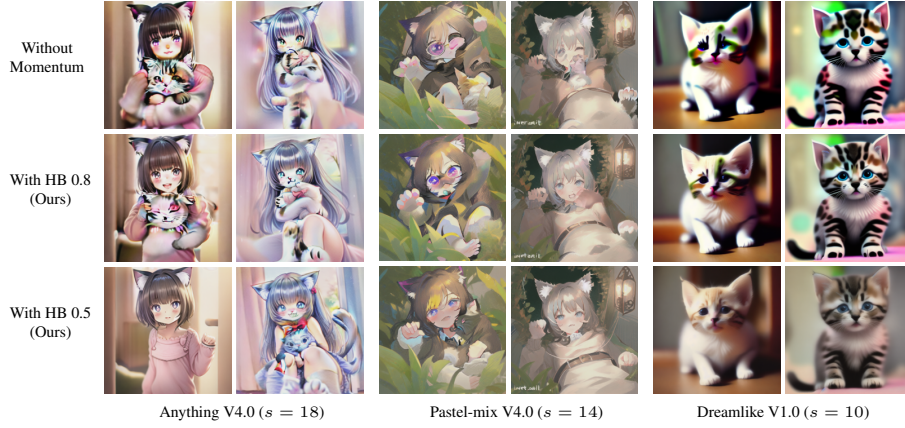(b) UniPC using 8 steps and guidance scale  $s$ . Prompt: “a cute kitty”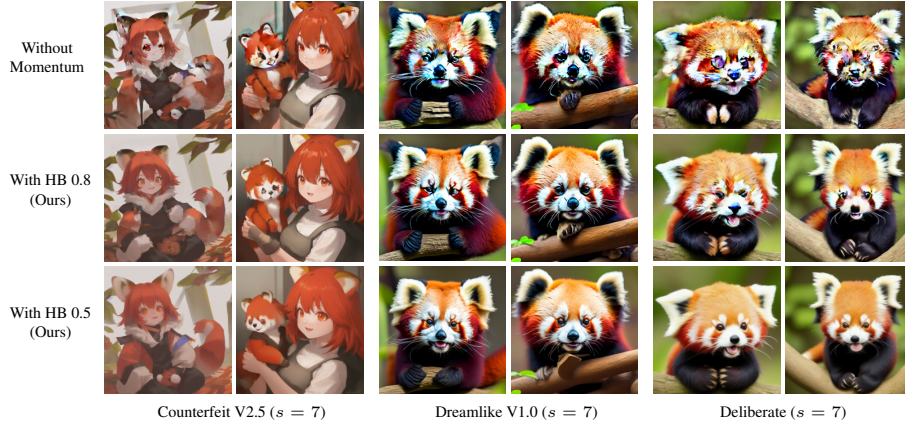(c) PLMS4 using 15 steps and guidance scale  $s$ . Prompt: “cute humanoid red panda”

Figure 16: Impact of different damping coefficients  $\beta$  on HB momentum for 2<sup>nd</sup>-order DPM-Solver++(2M) (Lu et al., 2022b), 3<sup>rd</sup>-order UniPC (Zhao et al., 2023), and 4<sup>th</sup>-order (Liu et al., 2022a). Incorporating higher momentum values (lower  $\beta$ ) helps mitigate the occurrence of divergence artifacts.

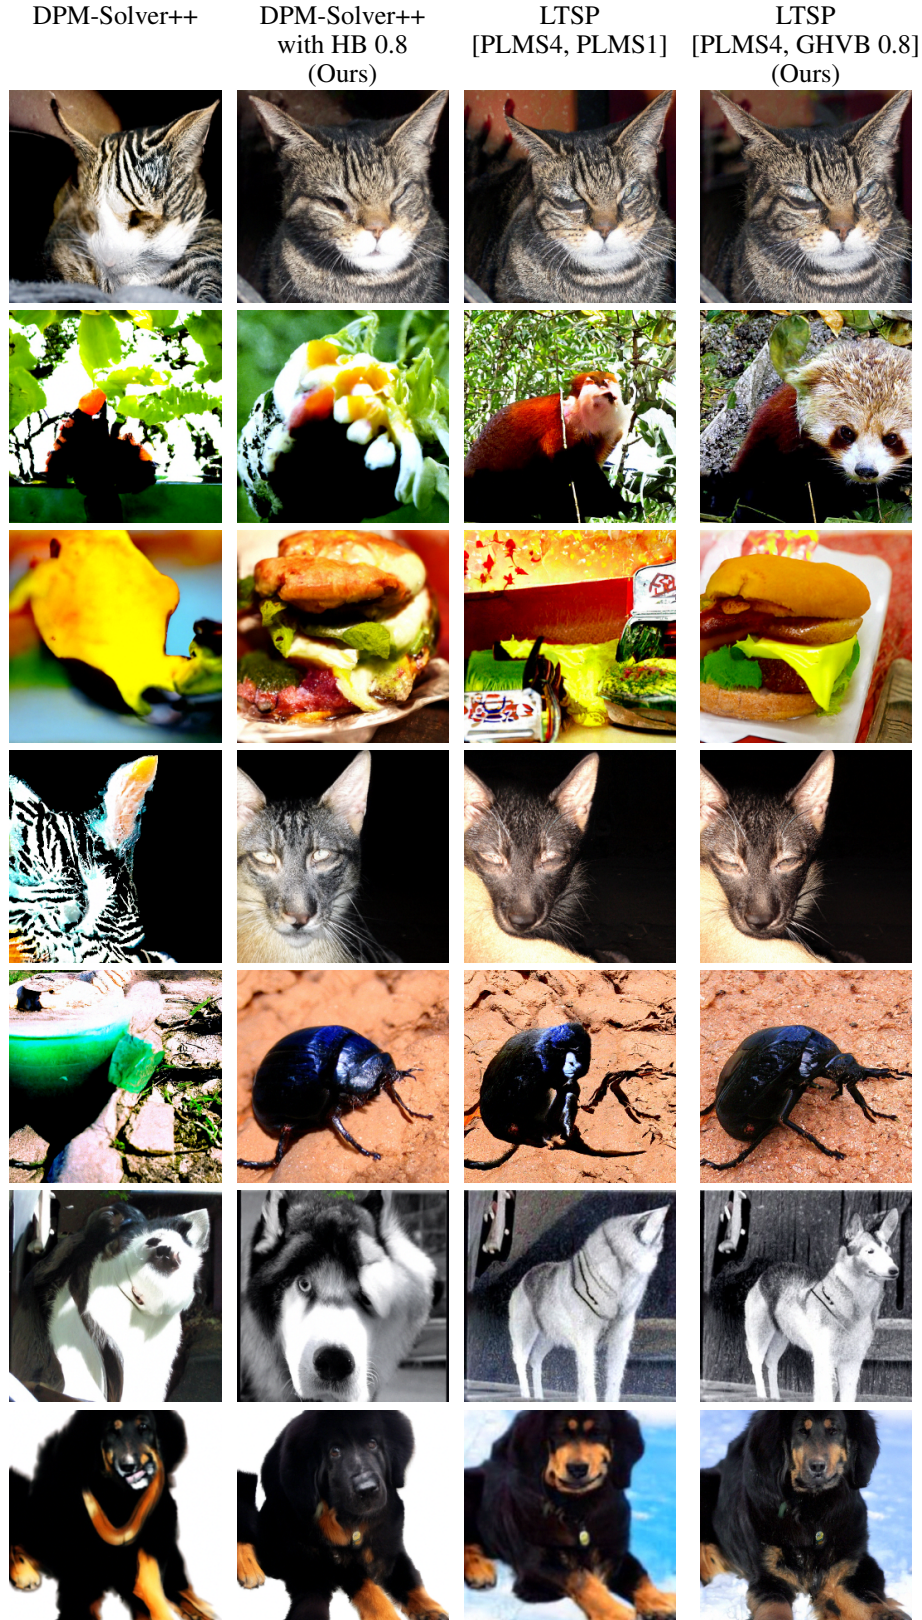

Figure 17: Samples from DPM-Solver++ (Lu et al., 2022b) and LTSP (Wizadwongsa & Suwanakorn, 2023) with and without momentum, employing classifier guidance diffusion with a guidance scale of 10 and 20 sampling steps.

## L ADDITIONAL EXPERIMENT ON DiT

This section supplements the experiment on DiT in Section 5.3 and reports results for two additional baselines: DPM-Solver++ (Lu et al., 2022b) and LTSP4 (Wizadwongsa & Suwajanakorn, 2023). The code implementation and pre-trained DiT model were obtained directly from the official GitHub repository<sup>9</sup>. The experiment was done on four NVIDIA GeForce RTX 2080 Ti GPUs and a 24-core AMD Threadripper 3960x CPU.

Table 2 presents the full results including those of the original baselines. Our technique is highlighted in grey in the table, and the best FID score for each number of steps is in bold. We also include the improved Precision and Recall metrics (Kynkäänniemi et al., 2019) in Tables 3 and 4, respectively, where higher values indicate superior performance. Generated samples for different sampling methods are shown in Figure 18. Our methods produce comparable FID scores to LTSP4 and PLMS4 at 25 steps, but outperform all baselines for lower 6-20 steps.

| Method               | Number of Steps |             |             |             |             |             |             |             |
|----------------------|-----------------|-------------|-------------|-------------|-------------|-------------|-------------|-------------|
|                      | 6               | 7           | 8           | 9           | 10          | 15          | 20          | 25          |
| DDIM                 | 55.35           | 36.97       | 26.06       | 19.47       | 15.02       | 8.04        | 6.52        | 5.94        |
| DPM-Solver++         | 18.60           | 10.80       | 7.93        | 6.72        | 6.13        | 5.49        | 5.30        | 5.24        |
| LTSP4 [PLMS4, PLMS1] | 13.33           | 9.01        | 7.49        | 6.55        | 6.09        | 5.32        | 5.20        | <b>5.17</b> |
| PLMS4                | 13.10           | 8.94        | 7.31        | 6.51        | 6.03        | 5.32        | 5.21        | <b>5.17</b> |
| PLMS4 w/ HB 0.8      | 14.35           | 9.25        | 7.46        | 6.68        | 6.19        | 5.47        | 5.29        | 5.24        |
| PLMS4 w/ HB 0.9      | 11.66           | 8.16        | 6.69        | 6.21        | <b>5.78</b> | <b>5.29</b> | <b>5.19</b> | <b>5.17</b> |
| GHVB 3.8             | <b>10.99</b>    | <b>7.93</b> | <b>6.63</b> | <b>6.19</b> | 5.80        | 5.31        | 5.22        | 5.18        |
| GHVB 3.9             | 11.67           | 8.29        | 6.83        | 6.30        | 5.87        | 5.31        | 5.22        | 5.18        |

Table 2: FID scores on DiT-XL

| Method          | Number of Steps |             |             |             |
|-----------------|-----------------|-------------|-------------|-------------|
|                 | 6               | 8           | 10          | 20          |
| DDIM            | 0.36            | 0.56        | 0.67        | 0.79        |
| DPM-Solver++    | 0.63            | 0.75        | 0.79        | <b>0.81</b> |
| LTSP4           | 0.67            | 0.74        | 0.78        | <b>0.81</b> |
| PLMS4           | 0.68            | 0.75        | 0.78        | <b>0.81</b> |
| PLMS4 w/ HB 0.8 | 0.68            | <b>0.77</b> | <b>0.79</b> | <b>0.81</b> |
| PLMS4 w/ HB 0.9 | 0.70            | <b>0.77</b> | <b>0.79</b> | <b>0.81</b> |
| GHVB3.8         | <b>0.71</b>     | <b>0.77</b> | <b>0.79</b> | <b>0.81</b> |
| GHVB3.9         | 0.70            | 0.76        | 0.78        | <b>0.81</b> |

Table 3: Precision on DiT-XL

| Method          | Number of Steps |             |             |             |
|-----------------|-----------------|-------------|-------------|-------------|
|                 | 6               | 8           | 10          | 20          |
| DDIM            | 0.60            | 0.64        | 0.65        | 0.67        |
| DPM-Solver++    | 0.67            | 0.68        | 0.68        | <b>0.68</b> |
| LTSP4           | <b>0.70</b>     | <b>0.70</b> | <b>0.69</b> | <b>0.68</b> |
| PLMS4           | <b>0.70</b>     | <b>0.70</b> | <b>0.69</b> | <b>0.68</b> |
| PLMS4 w/ HB 0.8 | 0.68            | 0.68        | 0.67        | <b>0.68</b> |
| PLMS4 w/ HB 0.9 | 0.69            | 0.69        | 0.67        | <b>0.68</b> |
| GHVB3.8         | 0.69            | <b>0.70</b> | 0.68        | <b>0.68</b> |
| GHVB3.9         | <b>0.70</b>     | <b>0.70</b> | <b>0.69</b> | <b>0.68</b> |

Table 4: Recall on DiT-XL

## M ADDITIONAL EXPERIMENT ON TEXT-TO-IMAGE GENERATION

To provide a more comprehensive evaluation of the methods discussed in Section 5.1, we utilize a fine-tuned variant of Stable-Diffusion called Anything V4. We consider full-path samples generated by PLMS4 (Liu et al., 2022a) at 1,000 steps as reference solutions. The performance of each method is evaluated by measuring the image similarity between the generated samples produced using a reduced number of steps and the reference samples. Importantly, both sets of samples originate from identical initial noise maps. This comparison allows us to assess how well the solution from each configuration matches the full-path reference solution.

<sup>9</sup><https://github.com/facebookresearch/DiT>

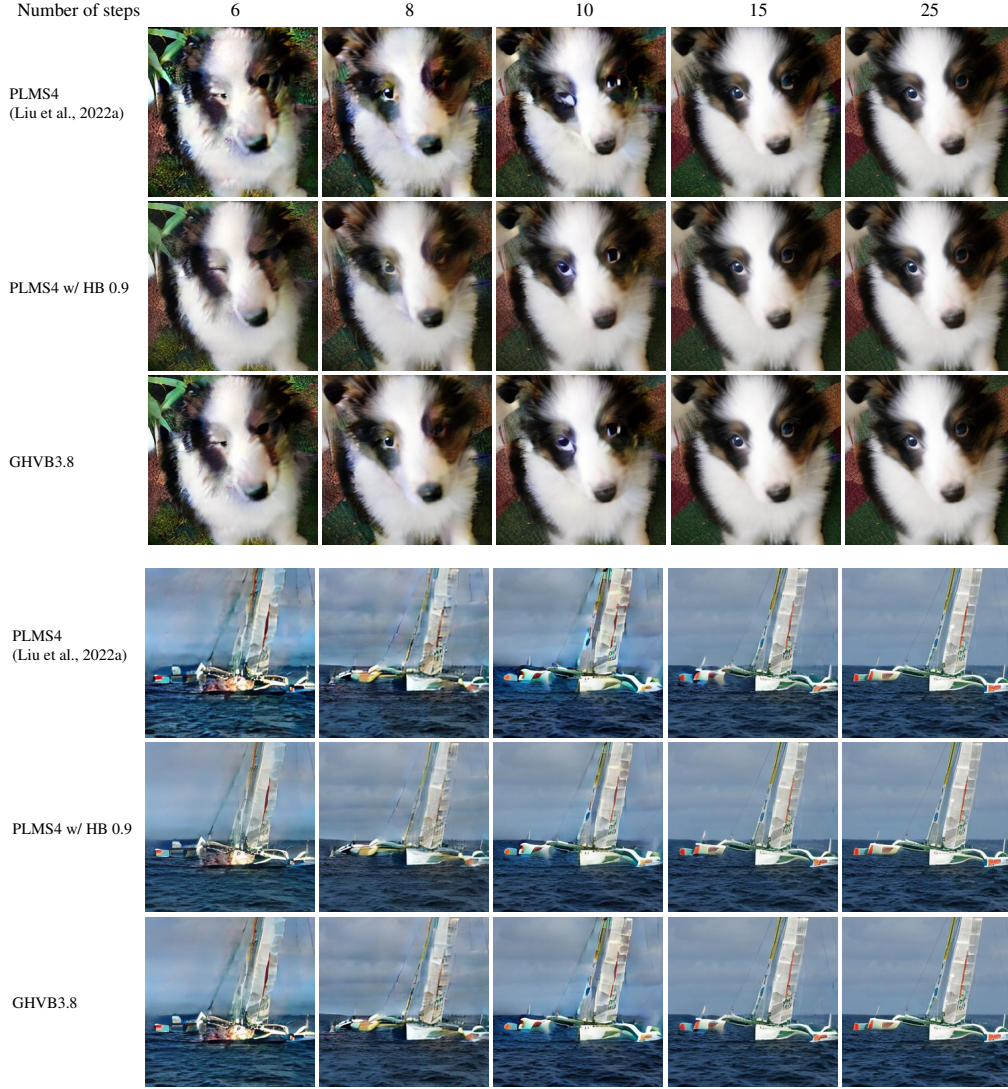

Figure 18: Comparison of samples generated from DiT-XL with a guidance scale of 3, using different sampling methods and sampling steps.

We measure image similarity using Learned Perceptual Image Patch Similarity (LPIPS) (Zhang et al., 2018) and the L2 norm in the latent space, as discussed in Section 4.2. The outcomes of these analyses are visually presented in Figure 19. We also include the results from other metrics, e.g., Structural Similarity Index (SSIM) (Wang et al., 2004) and High-Frequency Error Norm (HFEN) (Ravishankar & Bresler, 2010), in Figure 20.

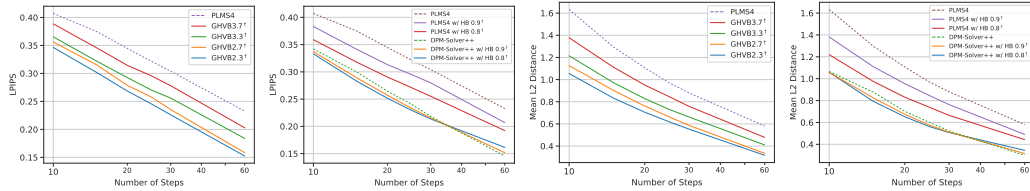

Figure 19: Comparison of LPIPS and L2 distance across different sampling methods, with and without using our momentum techniques. The experimental setting is similar to that in Section 5.1.

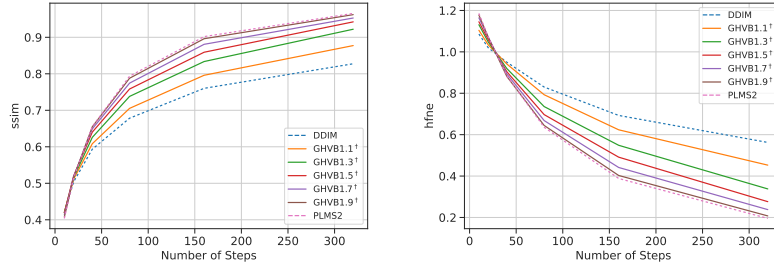

Figure 20: Comparison of SSIM (higher is better) and HFNE (lower is better) distance across different sampling methods, with and without using our momentum techniques. The experimental setting is similar to that in Figure 11.

Discrepancies between the numerical solutions and the 1,000-step reference solution can arise from two primary factors: the accuracy of the employed method and the presence of divergence artifacts. Notably, in this particular context, divergence artifacts tend to outweigh errors stemming from method accuracy. Consequently, higher-order methods exhibit greater discrepancies in both LPIPS and L2 similarity measurements. It is worth highlighting that our techniques demonstrate a remarkable ability to minimize deviations from the reference solution in the majority of cases. Furthermore, Figure 19 consistently demonstrates the superiority of our techniques compared to other methods, as evidenced by the lower LPIPS and L2 similarity scores. These results indicate that our techniques effectively both reduce divergence artifacts and handle errors related to method accuracy.

## N EXPERIMENT ON MDT

In this section, we conduct an additional experiment using Masked Diffusion Transformer (MDT) Gao et al. (2023) for classifier-free guidance diffusion sampling. The code implementation and MDT model pre-trained on ImageNet256 (Russakovsky et al., 2015) were obtained directly from the official GitHub repository<sup>10</sup>. The experiment was done on two NVIDIA GeForce RTX 3090 GPUs. Similar to the experiment on DiT-XL (Peebles & Xie, 2022) in Section 5.3, we compare FID scores of numerical solvers with our proposed momentum techniques to the baseline of PLMS4 (Liu et al., 2022a) and DDIM (Zhang et al., 2023) using 50,000 generated samples.

As presented in Table 5, both HB and GHVB momentum can mitigate artifacts and lead to improved FID scores compared to PLMS4. Note that using HB 0.8 yields worse FID scores compared to using PLMS4 alone because of its 1<sup>st</sup>-order convergence property. Similar to Appendix L, we also include the improved Precision and Recall metrics (Kynkäänniemi et al., 2019) in Tables 6 and 7. This experiment further highlights that our methods work across various recent diffusion models.

| Method          | Number of Steps |             |             |             |             |             |             |             |
|-----------------|-----------------|-------------|-------------|-------------|-------------|-------------|-------------|-------------|
|                 | 6               | 7           | 8           | 9           | 10          | 15          | 20          | 25          |
| DDIM            | 56.53           | 36.79       | 24.17       | 17.13       | 12.62       | 5.11        | 3.40        | 2.77        |
| PLMS4           | 11.10           | 6.44        | 5.45        | 4.30        | 3.89        | 2.53        | 2.15        | 2.01        |
| PLMS4 w/ HB 0.8 | 13.36           | 7.19        | 5.03        | 4.03        | 3.50        | 2.42        | 2.12        | 2.03        |
| PLMS4 w/ HB 0.9 | 10.48           | 5.77        | <b>4.38</b> | <b>3.65</b> | <b>3.26</b> | <b>2.28</b> | <b>2.03</b> | <b>1.96</b> |
| GHVB 3.8        | <b>9.67</b>     | <b>5.60</b> | 4.48        | 3.80        | 3.39        | 2.36        | 2.07        | 1.98        |
| GHVB 3.9        | 10.18           | 5.88        | 4.83        | 3.98        | 3.58        | 2.43        | 2.10        | 1.99        |

Table 5: FID scores on MDT

<sup>10</sup><https://github.com/sail-sg/MDT>

| Method          | Number of Steps |             |             |             |
|-----------------|-----------------|-------------|-------------|-------------|
|                 | 6               | 8           | 10          | 20          |
| DDIM            | 0.33            | 0.53        | 0.64        | 0.76        |
| PLMS4           | 0.66            | 0.71        | 0.73        | 0.76        |
| PLMS4 w/ HB 0.8 | 0.64            | 0.72        | <b>0.74</b> | <b>0.77</b> |
| PLMS4 w/ HB 0.9 | 0.66            | <b>0.73</b> | <b>0.74</b> | <b>0.77</b> |
| GHVB3.8         | <b>0.67</b>     | 0.72        | <b>0.74</b> | <b>0.77</b> |
| GHVB3.9         | <b>0.67</b>     | 0.71        | 0.73        | <b>0.77</b> |

Table 6: Precision on MDT

| Method          | Number of Steps |             |             |             |
|-----------------|-----------------|-------------|-------------|-------------|
|                 | 6               | 8           | 10          | 20          |
| DDIM            | 0.50            | 0.54        | 0.57        | 0.63        |
| PLMS4           | <b>0.62</b>     | <b>0.65</b> | <b>0.66</b> | <b>0.66</b> |
| PLMS4 w/ HB 0.8 | 0.59            | 0.63        | 0.64        | 0.64        |
| PLMS4 w/ HB 0.9 | 0.61            | 0.64        | 0.65        | 0.65        |
| GHVB3.8         | <b>0.62</b>     | <b>0.65</b> | <b>0.66</b> | 0.65        |
| GHVB3.9         | <b>0.62</b>     | <b>0.65</b> | <b>0.66</b> | <b>0.66</b> |

Table 7: Recall on MDT

## O EXPERIMENT ON PERSONALIZED IMAGE GENERATION

This section evaluates our methods on *personalized image generation*, a task which involves generating images with specific concepts, styles, or following certain compositions given by reference images. The sampling process in this task is significantly more challenging to speed up due to a greater incidence of artifacts compared to the regular diffusion sampling conditioned with only a text prompt. All experiments were conducted on four NVIDIA RTX A4000 GPUs.

### O.1 FACE-IDENTITY PRESERVING IMAGE GENERATION

This experiment focuses on generating images of people’s faces with certain face orientations, specified by face key points. We fine-tuned Stable Diffusion (Rombach et al., 2022) using 6 rank-1 LoRAs (Hu et al., 2021) across six facial identities, which was implemented in the GitHub repository<sup>11</sup>. We used a face dataset accessible at Kaggle<sup>12</sup>. For each identity in the dataset, the corresponding LoRA was trained with 10 randomly selected images using *Pivotal Tuning* (Roich et al., 2022), consisting of Textual Inversion (Gal et al., 2022) followed by LoRA DreamBooth (Ruiz et al., 2022) training, for 1,000 steps. Note that we employed Stable Diffusion 1.5<sup>13</sup> as the base model. Our proposed HB methods were applied to PLMS4 (Liu et al., 2022a) and DPM-Solver++ (Lu et al., 2022b), which also served as baselines for our comparison.

At test time, we utilized a variant of Stable Diffusion named DreamShaper<sup>14</sup> and applied the 6 LoRAs with fixed LoRA scaling parameters  $\alpha = 1.0$  and  $\alpha = 0.4$  for the text encoder and the UNet model, respectively, resulting in 6 different models. The sampling process is further conditioned with the outputs from the ControlNet V1.1<sup>15</sup> trained on a human pose estimation task. Subsequently, we prepared 25 sets of inputs, i.e., text prompt, face key points, random seed, and a fixed guidance scale of 15, and generated 25 converged, reference results by applying 1,000-step PLMS4 sampling to each of the 6 augmented models, resulting in a total of 150 target images. For evaluation, we calculated the mean LPIPS (Zhang et al., 2018) and L2 distance between these images latent and those generated by each ODE solver when provided with the same inputs.

For each numerical solver employing momentum number  $\beta$ , we conducted a grid search to find the optimal value in the range  $[0.1, \dots, 0.9]$  that yields the least number of sampling steps such that the LPIPS is comparable to that of 200-step DDIM Zhang et al. (2023). As shown in Figure 21, the results indicate that, with the same number of sampling steps, PLMS4 with HB and GHVB generated higher-quality images than vanilla PLMS4. This implies that those with momentum can achieve the target image quality with fewer steps. In particular, our two methods reached the LPIPS threshold set by the 200-step DDIM method with 16.53% and 25.38% less sampling time, respectively, compared to PLMS4 without momentum. A similar result can be observed when comparing DPM-Solver++ and its HB momentum variant, resulting in 18.22% less sampling time. Figures 23 and 24 provide examples of the generated images.

<sup>11</sup><https://github.com/cloneofsimo/lora>

<sup>12</sup><https://www.kaggle.com/datasets/vishesh1412/celebrity-face-image-dataset>

<sup>13</sup><https://huggingface.co/runwayml/stable-diffusion-v1-5>

<sup>14</sup><https://huggingface.co/Lykon/DreamShaper>

<sup>15</sup>[https://huggingface.co/lllyasviel/control\\_v11p\\_sd15\\_openpose](https://huggingface.co/lllyasviel/control_v11p_sd15_openpose)

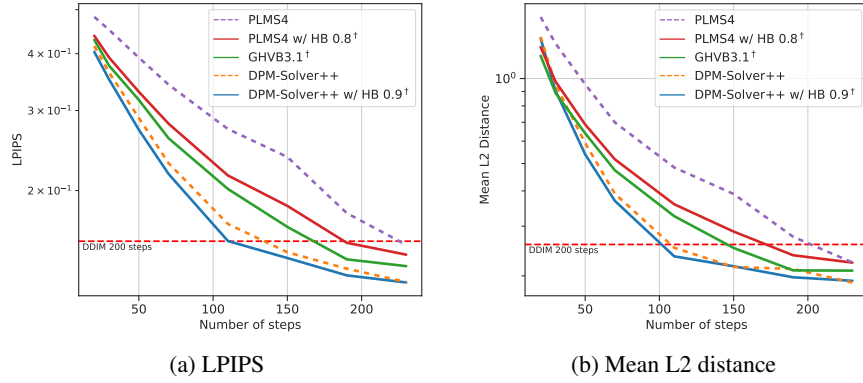

Figure 21: Comparison of LPIPS and L2 distance of (a) PLMS4 with and without momentum, (b) DPM-Solver++ with and without momentum, and (c) GHVB in the face-identity preserving image generation experiment.

## O.2 REFERENCE-ONLY CONTROL GENERATION

We evaluate our techniques on the *reference-only control pipeline* implemented for Stable Diffusion in the following GitHub repository<sup>16</sup>. This pipeline conditions the sampling process on a text prompt and a reference image, enabling content and style transfer of the reference image via attention mechanism and feature rescaling proposed in AdaIN (Huang & Belongie, 2017).

We utilize a fine-tuned Stable Diffusion model named Anything V3.0<sup>17</sup> to generate Japanese animation-style images. Specifically, we prepared 150 sets of inputs, i.e., text prompt, reference image, random seed, and a fixed guidance scale of 7.5 and style fidelity of 1.0 (see <sup>16</sup>), and generated the target results by using a 1,000-step PLMS4 (Liu et al., 2022a). For evaluation, we calculated the mean LPIPS (Zhang et al., 2018) and L2 distance between the pseudo-converged result and those generated by numerical solvers when provided with the same inputs.

The results in Figure 22 suggest that PLMS4 with HB and GHVB generated higher-quality images than the regular PLMS4. Specifically, our two methods reached the LPIPS threshold set by the 150-step DDIM method with 32.40% and 42.92% less sampling time, respectively, compared to PLMS4 without momentum. Figure 25 provides examples of the generated images.

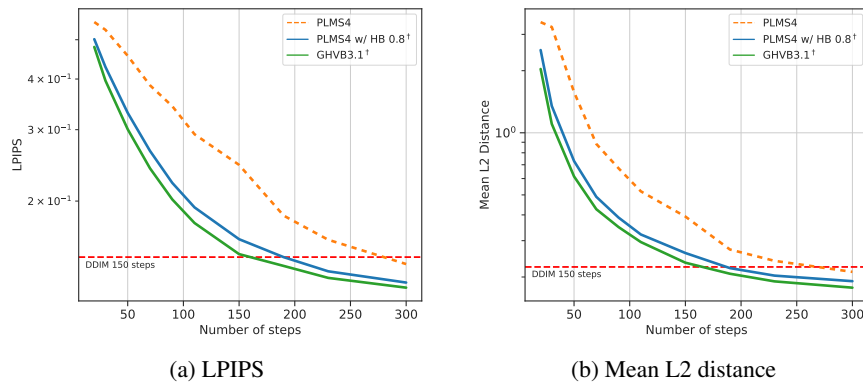

Figure 22: Comparison of LPIPS and L2 distance of (a) PLMS4 with and without momentum and (b) GHVB in the reference-only control experiment.

<sup>16</sup>[https://github.com/huggingface/diffusers/blob/main/examples/community/stable\\_diffusion\\_reference.py](https://github.com/huggingface/diffusers/blob/main/examples/community/stable_diffusion_reference.py)

<sup>17</sup><https://huggingface.co/Linaqruf/anything-v3.0>

<sup>18</sup>[https://huggingface.co/datasets/yuvalkirstain/beautiful\\_interesting\\_spectacular\\_photo\\_anime\\_25000](https://huggingface.co/datasets/yuvalkirstain/beautiful_interesting_spectacular_photo_anime_25000)

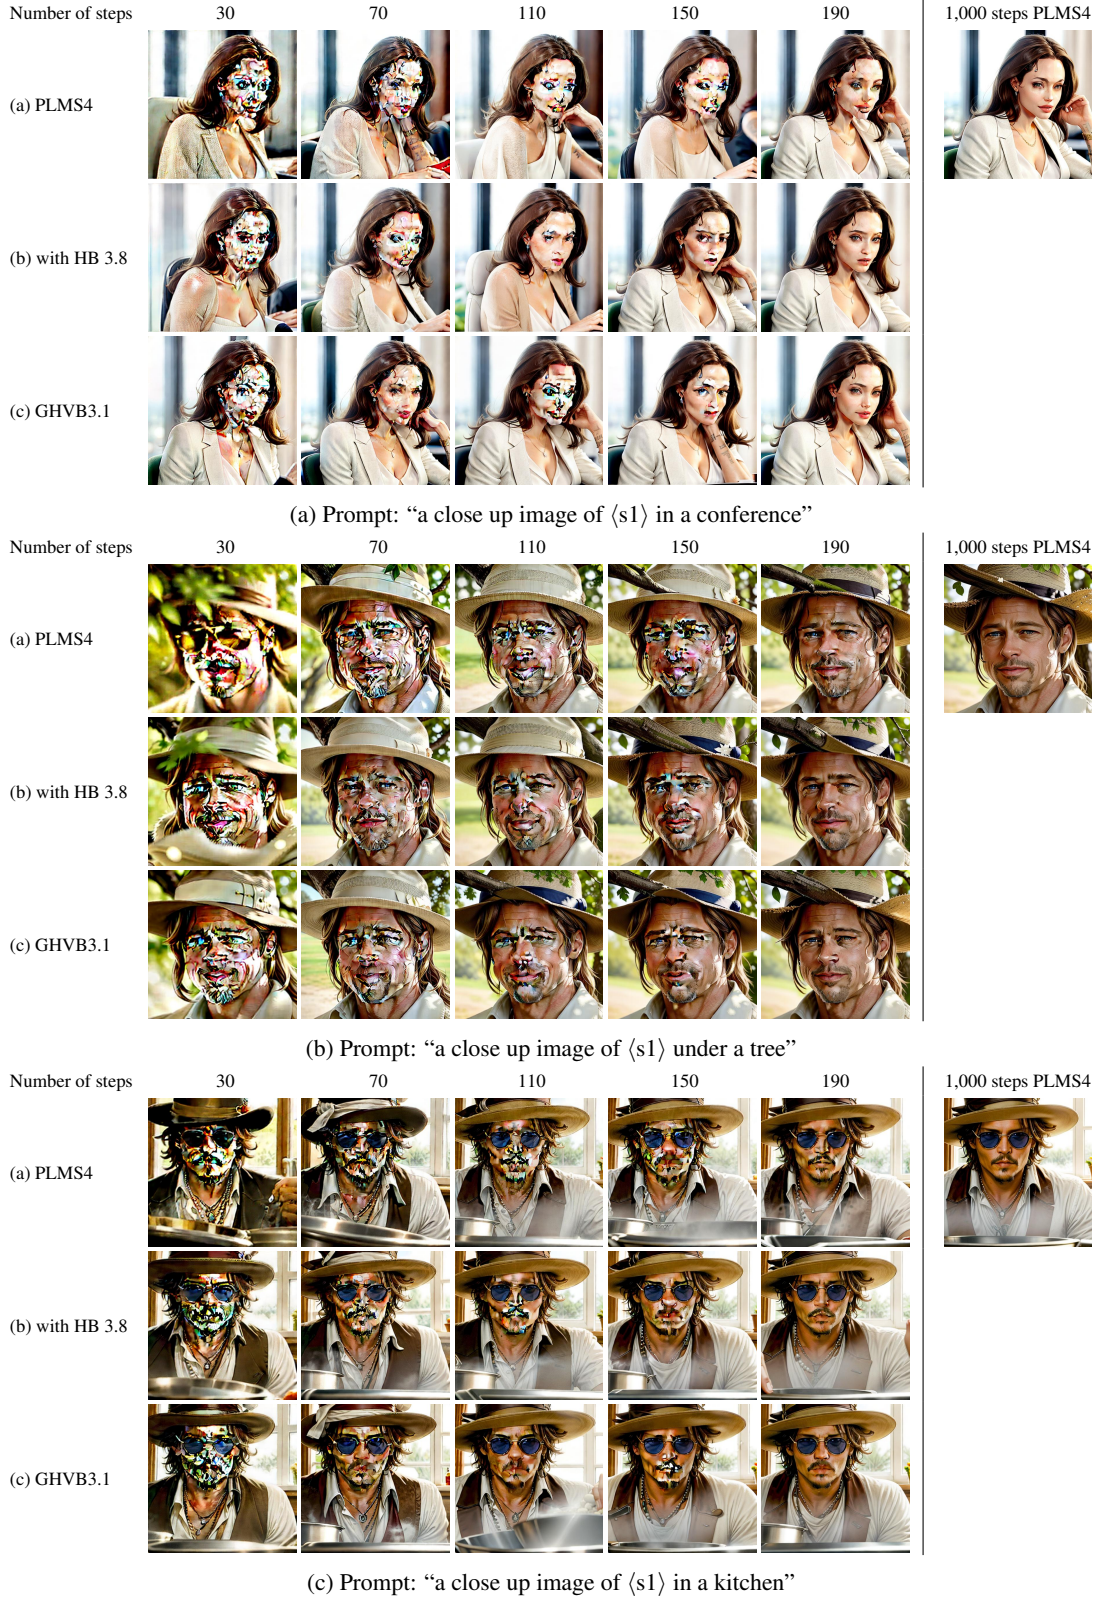

Figure 23: Comparison of samples generated from a fine-tuned Stable Diffusion model called DreamShaper with (a) PLMS4 (Liu et al., 2022a), (b) PLMS4 with HB 0.8, and (c) GHVB3.1 using different number of sampling steps and guidance scale  $s = 15$ .

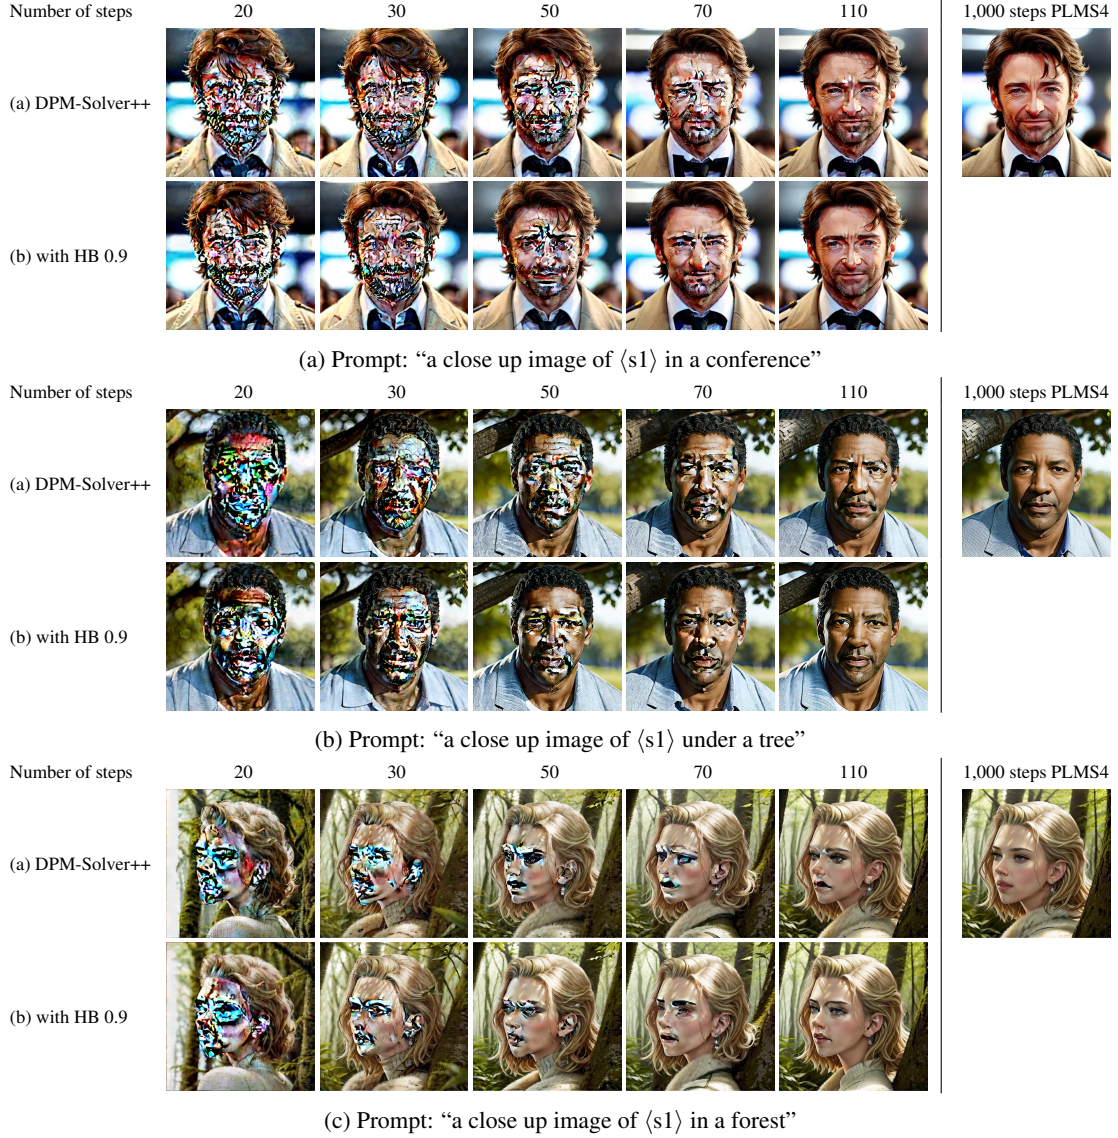

Figure 24: Comparison of samples generated from a fine-tuned Stable Diffusion model called DreamShaper with (a) DPM-Solver++ (Lu et al., 2022b) and (b) DPM-Solver++ with HB 0.9 using different number of sampling steps and guidance scale  $s = 15$ .

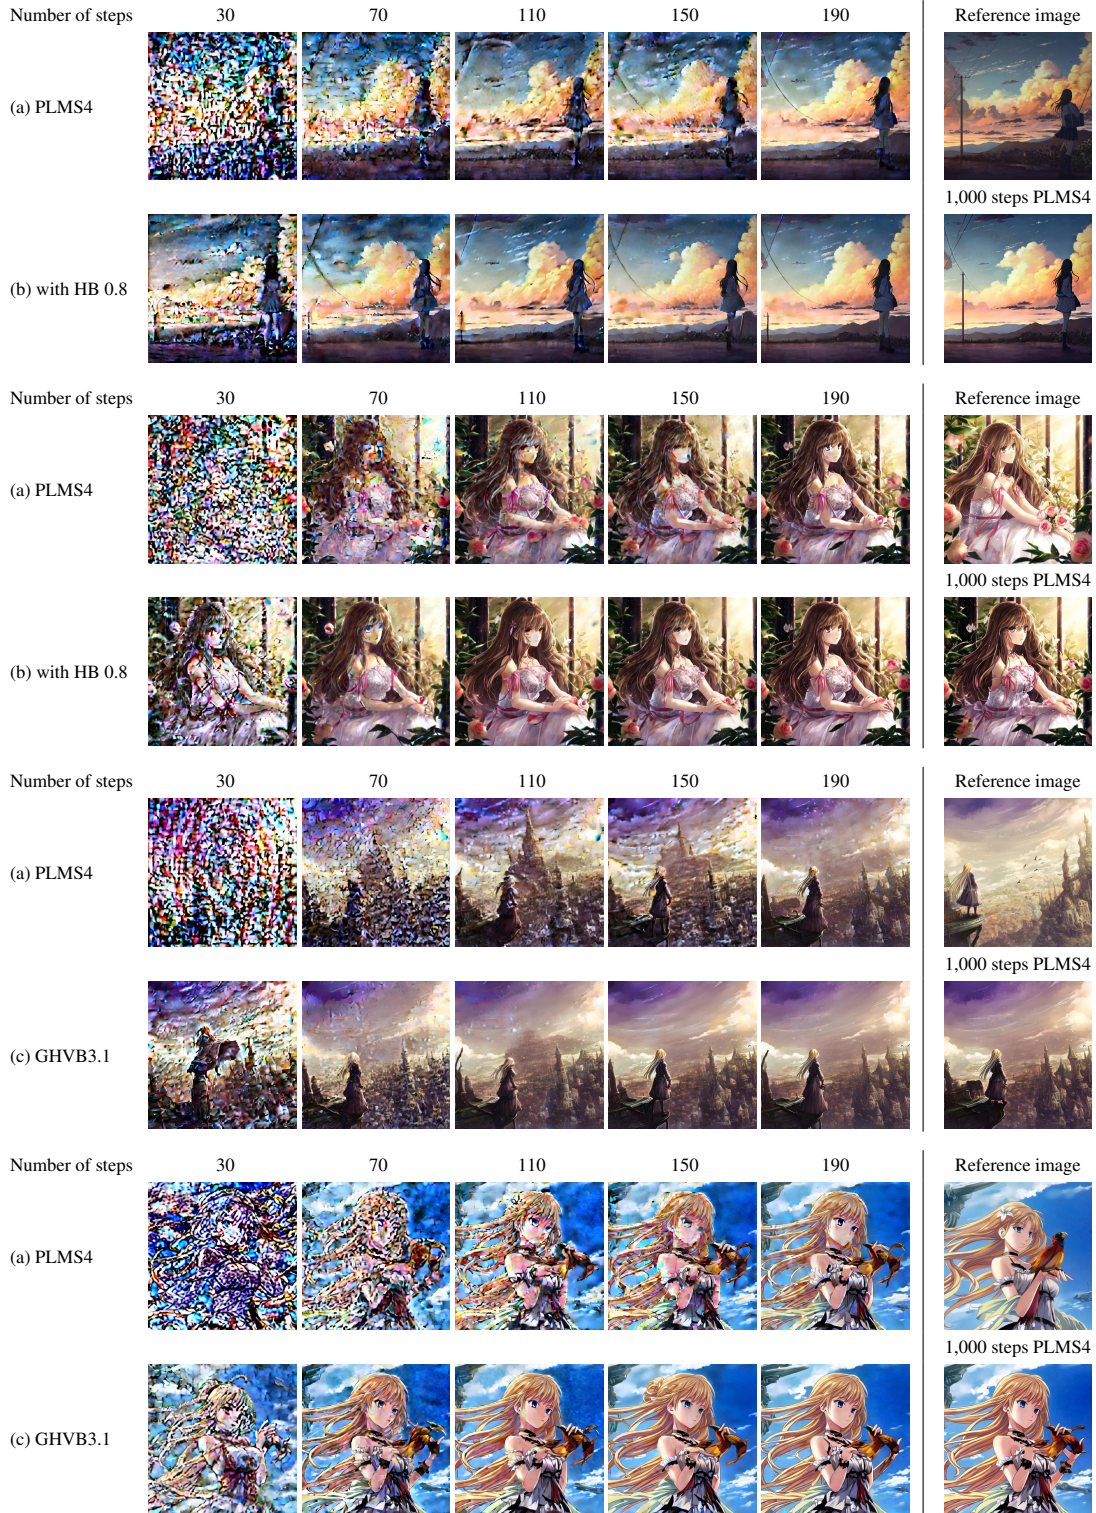

Figure 25: Comparison of samples generated from a fine-tuned Stable Diffusion model named Anything V3.0 in reference-only control pipeline with (a) PLMS4 (Liu et al., 2022a), (b) PLMS4 with HB 0.8, and (c) GHVB3.1 using different number of sampling steps and guidance scale  $s = 12$ . Reference images are available on Hugging Face<sup>18</sup>. Prompt: “1girl”

## P FACTORS CONTRIBUTING TO ARTIFACT OCCURRENCE IN FINE-TUNED DIFFUSION MODELS

We investigate three factors that influence the occurrence of divergence artifacts in diffusion sampling: number of steps, guidance scale, and choice of diffusion models. We present results obtained from Stable Diffusion 1.5 (Figure 27) and other models fine-tuned to generate images in specific styles: Midjourney (Figure 29), Japanese animation (Figure 31), and photorealistic (Figure 33).

Our observations reveal that insufficient numbers of steps and high guidance scales positively correlate with the presence of divergence artifacts in the generated samples. Fine-tuned models exhibit a higher sensitivity to these factors, resulting in a greater incidence of artifacts compared to Stable Diffusion 1.5. Consistent with the findings presented in Section 3.2, reducing the number of steps increases the likelihood of artifact occurrence. Furthermore, increasing the guidance scale amplifies the magnitude of eigenvalues, contributing to the presence of artifacts.

The choice of diffusion model also impacts artifact occurrence. Stable Diffusion 1.5 produces the fewest artifacts compared to the fine-tuned models. Among these fine-tuned models, Openjourney, which yields results similar to those obtained from Stable Diffusion 1.5, exhibits the lowest occurrence of artifacts. This suggests that extensive changes to the model may alter the eigenvalues and lead to an increased presence of artifacts.

Additionally, we present the results of our techniques for mitigating divergence artifacts in Figure 28, 30, 32, and 34. The parameter  $\beta$  that offers the optimal tradeoff between reducing artifacts and maintaining accuracy depends on the chosen guidance scale and diffusion model.

## Q ABLATION STUDY ON HB MOMENTUM

This section provides a comprehensive analysis of the convergence speed of Polyak’s Heavy Ball (HB) momentum, which can be incorporated into existing diffusion sampling methods by modifying a few lines of code. Specifically, we compare the results obtained from several methods with and without HB momentum with the targets generated from the 1,000-step DDIM, using LPIPS in the image space and L2 in the latent space. We then estimate their orders of convergence, as explained in Appendix I. The results are visually presented in Figure 26.

In contrast to the interpolation-like behavior observed in Figure 12 for GHVB, we observe that the use of HB momentum leads to an increase in both the LPIPS score and the L2 distance when selecting values of  $\beta$  that are less than 1. This is even worse than the 1<sup>st</sup>-order method DDIM when  $\beta$  is below 0.7. These findings indicate a deviation from the desired convergence behavior, highlighting a potential decrease in solution accuracy, even though HB momentum has been shown to successfully mitigate divergence artifacts.

Additionally, we find that the numerical orders of convergence also tend to approach the same value. These observations align with our analysis in Theorem 1 of Appendix H, indicating that when  $\beta$  deviates from 1, the employed approach exhibits 1<sup>st</sup>-order convergence and is unable to achieve high-order convergence. These conclusions emphasize the importance of carefully considering the choice of  $\beta$  in order to strike a balance between convergence speed and solution quality. Further details and insights into the performance of the HB momentum approach can be obtained from Figure 26, enhancing our understanding of its behavior within the context of the studied problem.

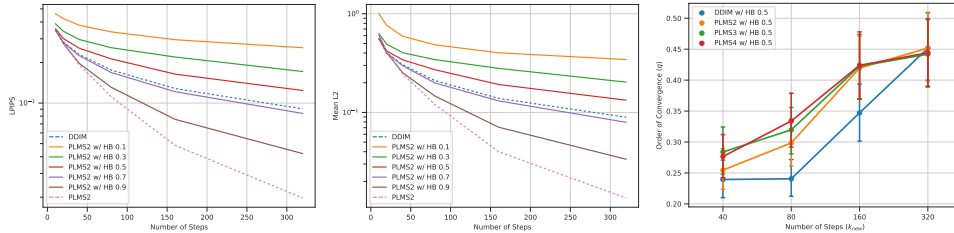

Figure 26: Comparison of LPIPS, mean L2 distance, and order of convergence of HB when using different damping coefficients. Statistical means are averaged from 160 initial latent codes.

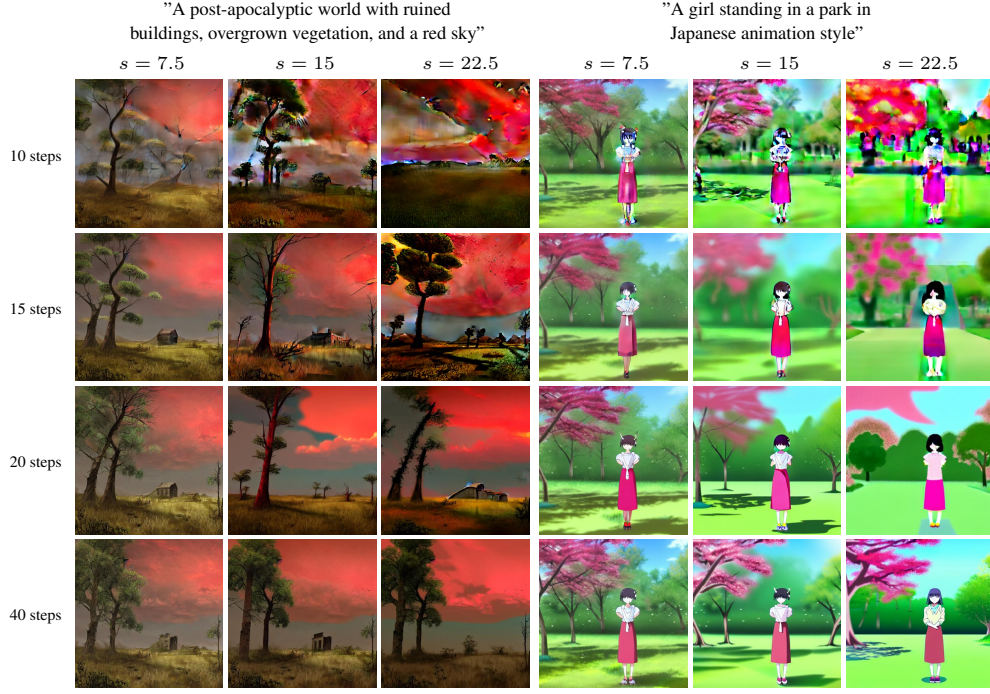

Figure 27: Comparison of samples generated from Stable Diffusion 1.5<sup>19</sup> using PLMS4 (Liu et al., 2022a) with different sampling steps and guidance scale.

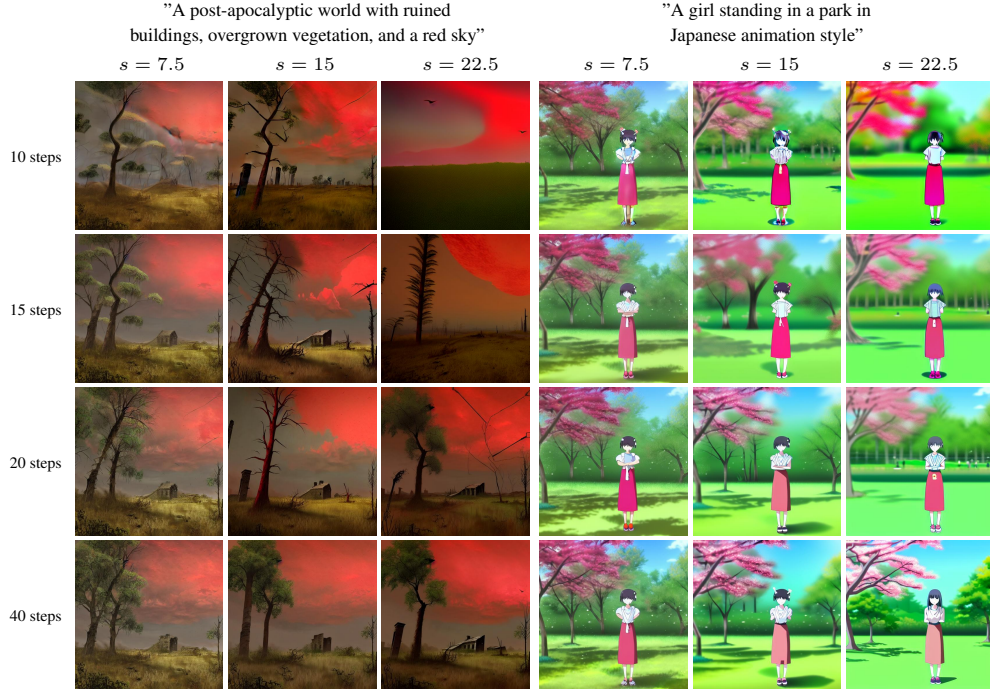

Figure 28: Comparison of samples generated from Stable Diffusion 1.5 using PLMS4 with HB  $\beta$  under various sampling steps and guidance scale  $s$ . Specifically, we employ  $\beta = 0.9$  for  $s = 7.5$ ,  $\beta = 0.8$  for  $s = 15$ , and  $\beta = 0.6$  for  $s = 22.5$  to account for the varying degrees of artifact manifestation associated with each guidance scale.

<sup>19</sup><https://huggingface.co/runwayml/stable-diffusion-v1-5>

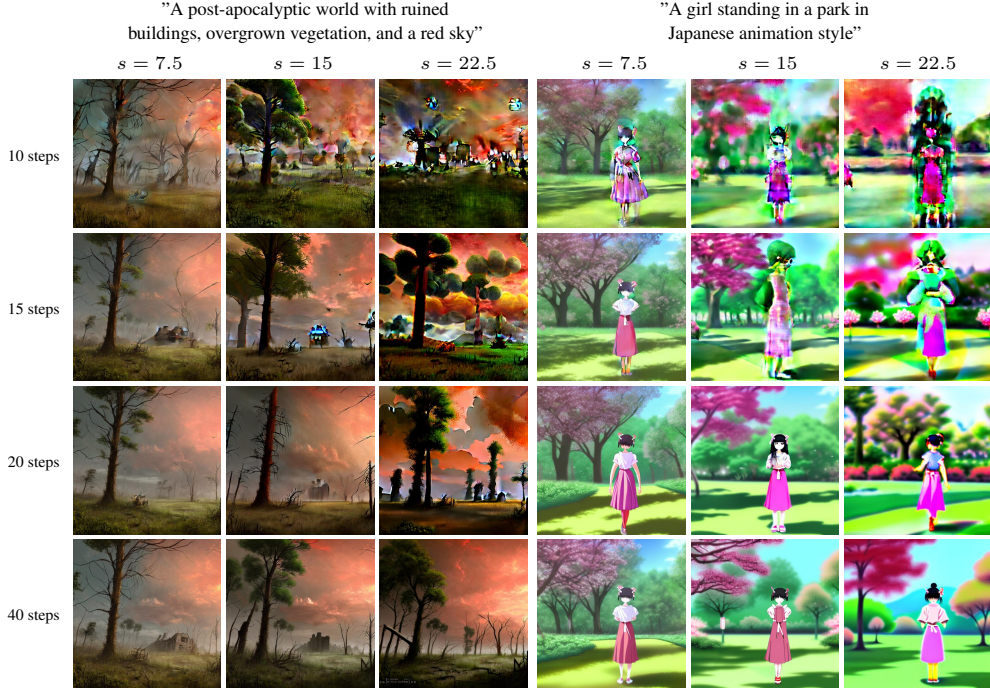

Figure 29: Comparison of samples generated from Openjourney<sup>20</sup> using PLMS4 (Liu et al., 2022a) with different sampling steps and guidance scale.

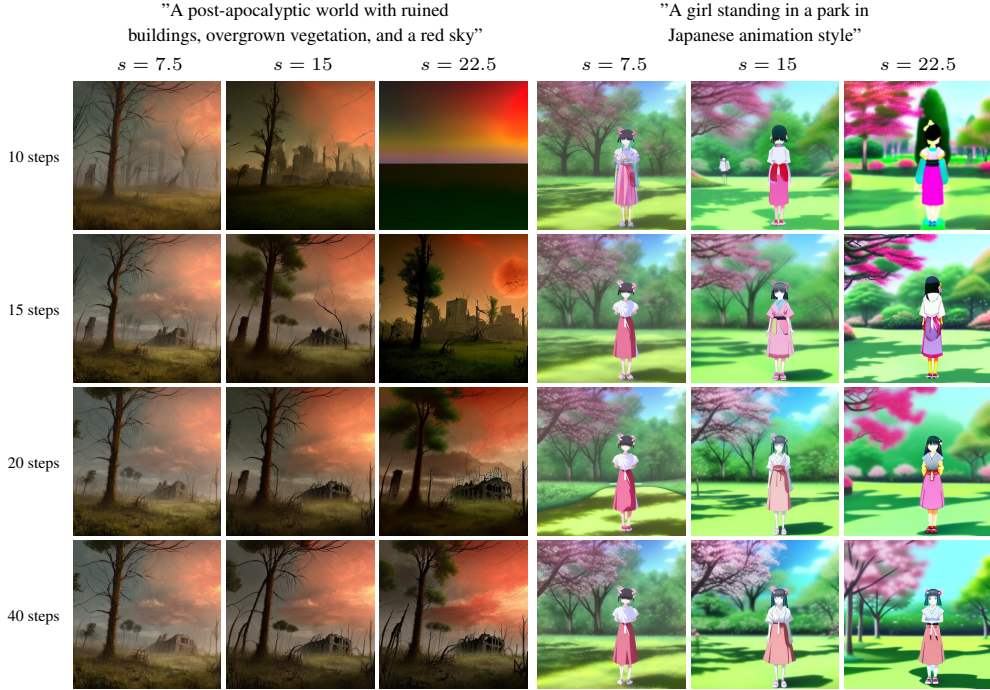

Figure 30: Comparison of samples generated from Openjourney using PLMS4 with HB  $\beta$  under various sampling steps and guidance scale  $s$ . Specifically, we employ  $\beta = 0.8$  for  $s = 7.5$ ,  $\beta = 0.6$  for  $s = 15$ , and  $\beta = 0.6$  for  $s = 22.5$  to account for the varying degrees of artifact manifestation associated with each guidance scale.

<sup>20</sup><https://huggingface.co/prompthero/openjourney>

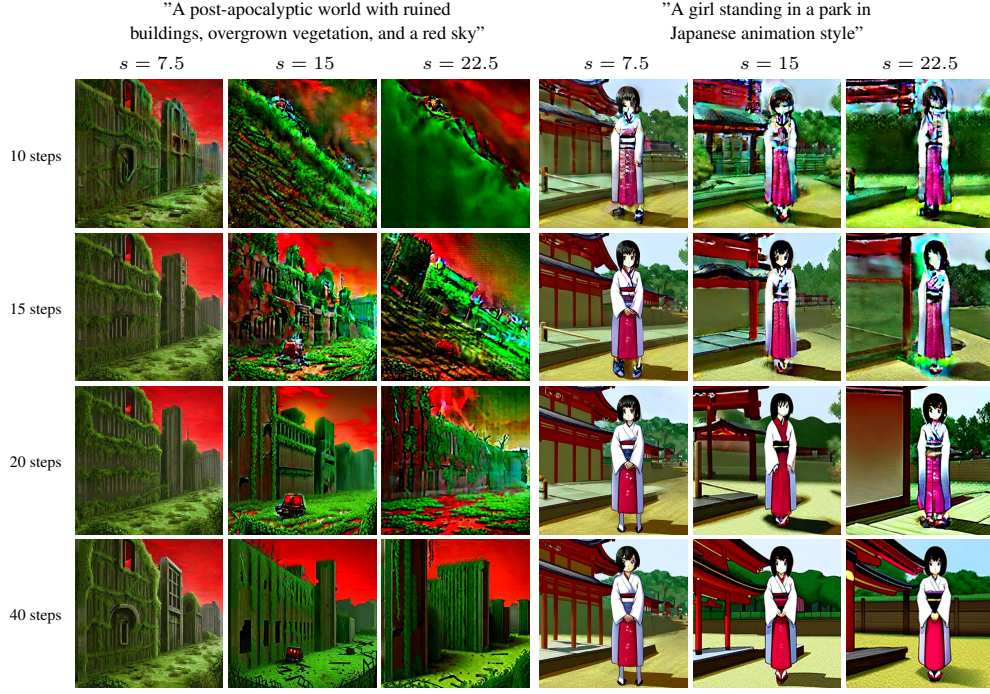

Figure 31: Comparison of samples generated from Waifu Diffusion V1.4<sup>21</sup> using PLMS4 (Liu et al., 2022a) with different sampling steps and guidance scale.

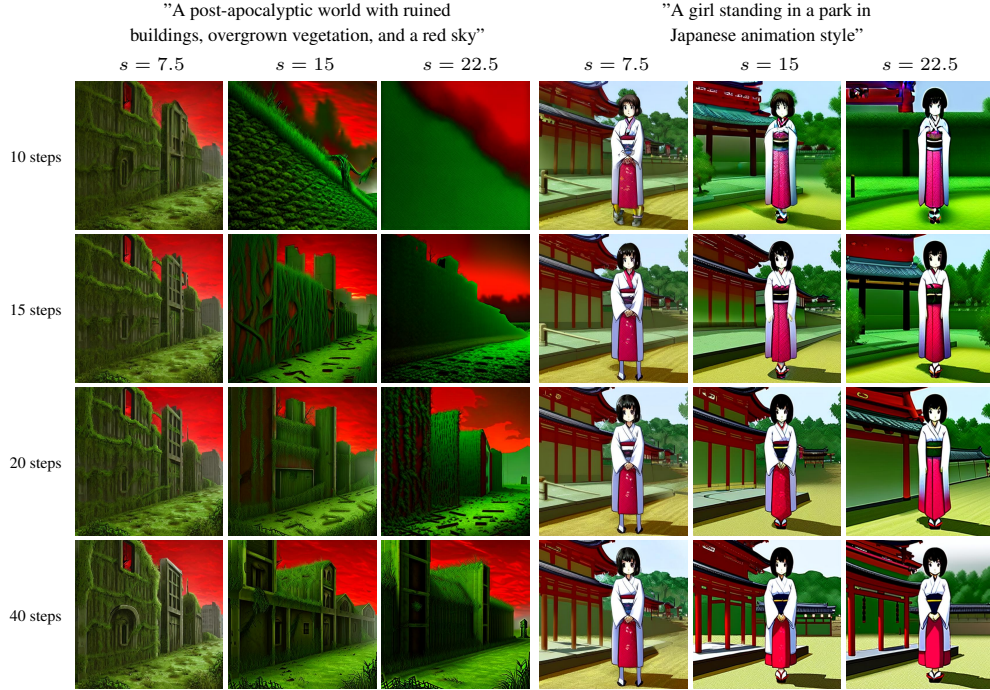

Figure 32: Comparison of samples generated from Waifu Diffusion V1.4 using PLMS4 with HB  $\beta$  under various sampling steps and guidance scale  $s$ . Specifically, we employ  $\beta = 0.8$  for  $s = 7.5$ ,  $\beta = 0.7$  for  $s = 15$ , and  $\beta = 0.6$  for  $s = 22.5$  to account for the varying degrees of artifact manifestation associated with each guidance scale.

<sup>21</sup><https://huggingface.co/hakurei/waifu-diffusion>

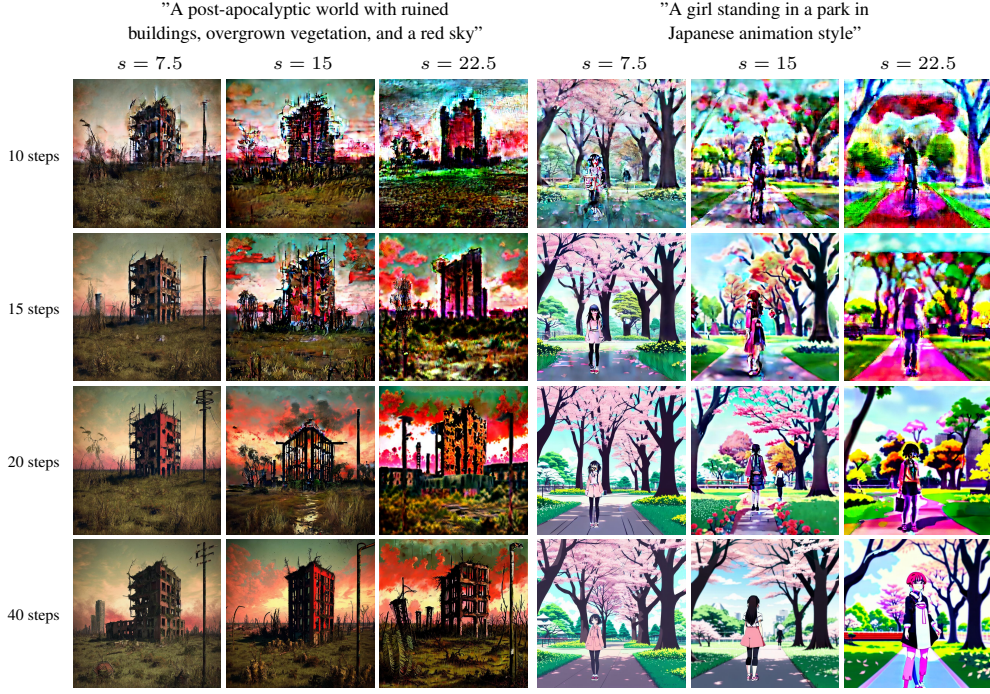

Figure 33: Comparison of samples generated from Dreamlike Photoreal 2.0<sup>22</sup> using PLMS4 (Liu et al., 2022a) with different sampling steps and guidance scale.

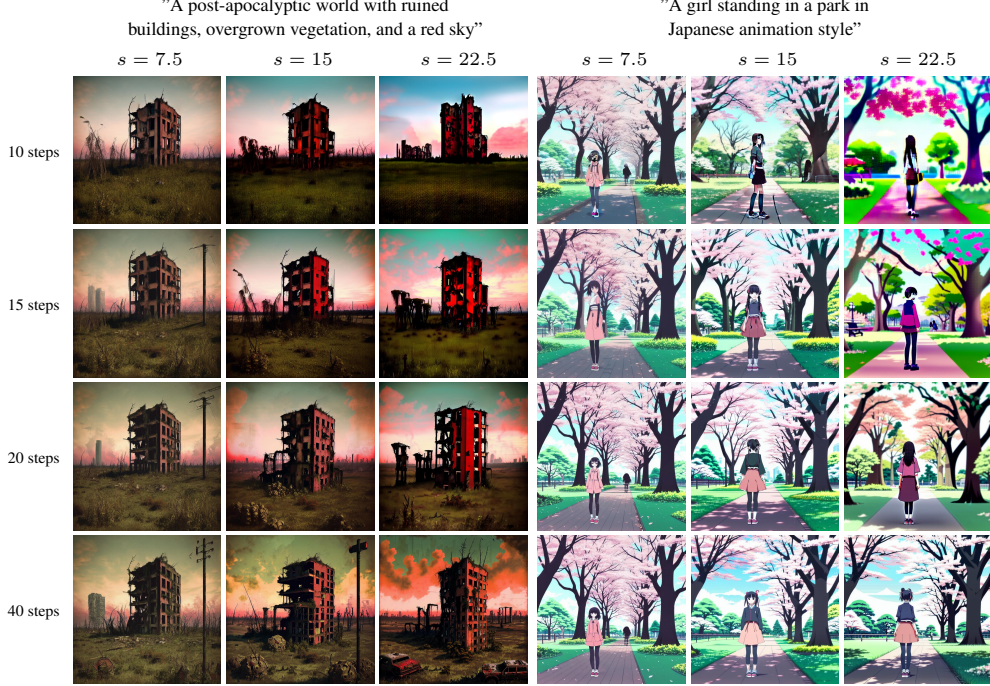

Figure 34: Comparison of samples generated from Dreamlike Photoreal V2.0 using PLMS4 with HB  $\beta$  under various sampling steps and guidance scale  $s$ . Specifically, we employ  $\beta = 0.7$  for  $s = 7.5$ ,  $\beta = 0.6$  for  $s = 15$ , and  $\beta = 0.6$  for  $s = 22.5$  to account for the varying degrees of artifact manifestation associated with each guidance scale.

<sup>22</sup><https://huggingface.co/dreamlike-art/dreamlike-photoreal-2.0>

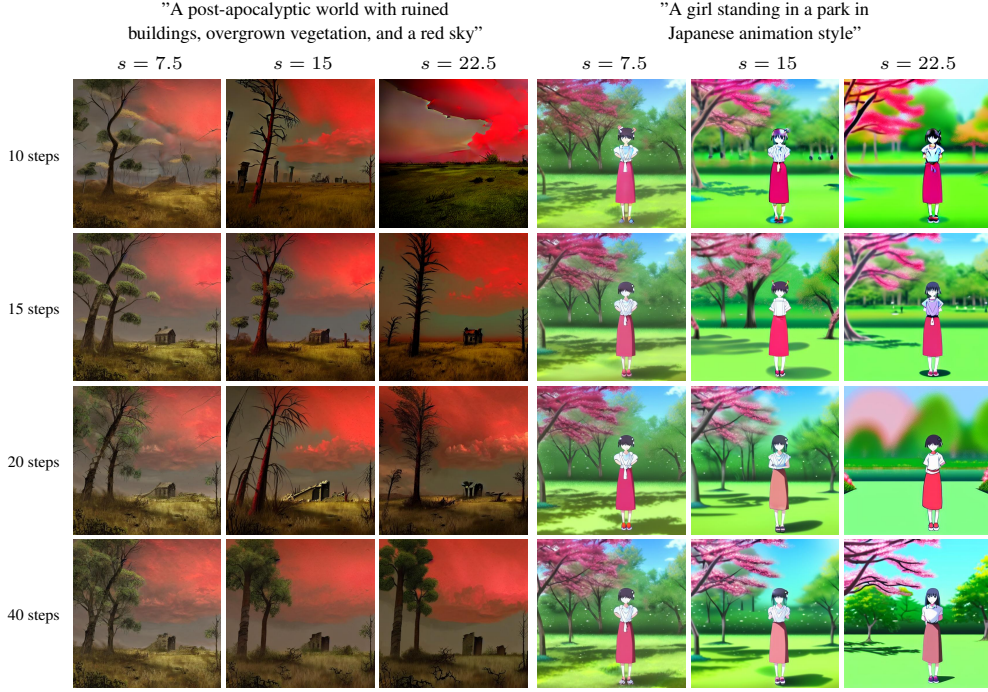

Figure 35: Comparison of samples generated from Stable Diffusion 1.5 using GHVB( $3.0 + \beta$ ) under various sampling steps and guidance scale  $s$ . Specifically, we employ  $\beta = 0.5$  for  $s = 7.5$ ,  $\beta = 0.2$  for  $s = 15$ , and  $\beta = 0.1$  for  $s = 22.5$  to account for the varying degrees of artifact manifestation associated with each guidance scale.

## R ABLATION STUDY ON NESTEROV MOMENTUM

In Appendix G, we investigated the potential of incorporating different types of momentum, such as Nesterov’s momentum, into existing diffusion sampling methods to mitigate divergence artifacts. Similar to the analysis conducted in Section 5.4 and Appendix Q, the primary objective of this section is to explore the convergence speed of Nesterov’s momentum by comparing two key metrics: LPIPS in the image space and L2 in the latent space.

Figure 36 presents the results, which reveal intriguing parallels with the behavior of HB momentum observed in Figure 26. When Nesterov’s momentum is applied to the PLMS2 method, the solution accuracy progressively diminishes as the value of  $\beta$  deviates from 1, as indicated by the corresponding increase in both LPIPS and L2 metrics. Notably, the model’s accuracy drops below that of the DDIM when  $\beta$  falls below 0.5. Qualitative comparisons of these two types of momentum are shown in Figure 37.

Furthermore, our analysis of the order of convergence demonstrates that Nesterov’s momentum does not achieve a high order of convergence, similar to HB momentum. These findings emphasize the importance of carefully considering the choice of momentum method, along with the specific values assigned to  $\beta$ , in order to strike an optimal balance between convergence speed and solution quality.

## S ABLATION STUDY ON MAGNITUDE SCORE

In this section, our objective is to provide further verification and justification of the experiment conducted in Section 5.1 by exploring various parameter settings for the magnitude score and assessing their effects on the selected model.

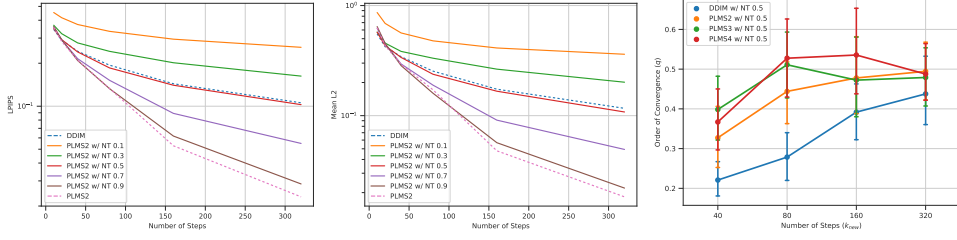

Figure 36: Comparison of LPIPS, mean L2 distance, and order of convergence of Nesterov’s momentum when using different damping coefficients. Statistical means are averaged from 160 initial latent codes.

### S.1 RESULTS WITH ALTERNATIVE PARAMETER SETTINGS

To gain deeper insights into the integration of momentum into sampling methods, we analyze the results of the magnitude scores depicted in Figure 7 (Section 5.1). This analysis involves varying the threshold  $\tau$  and the kernel size  $k$  for max-pooling in the calculation of the magnitude score. By investigating different parameter settings, we aim to validate the outcomes of the experiment and uncover the scaling impact of the magnitude score. The results, shown in Figure 38, highlight the influence of threshold  $\tau$  and kernel size  $k$  on the magnitude score. It is important to note that while extreme values of  $\tau$  or  $k$  may introduce ambiguity in interpreting the outcomes, the overall observed trends remain consistent.

### S.2 RESULTS ON ALTERNATIVE MODELS

In this section, we present the findings from our analysis conducted on alternative diffusion models, namely Stable Diffusion 1.5, Waifu Diffusion V1.4, and Dreamlike Photoreal 2.0. The primary aim of this investigation is to assess the impact of different models on the magnitude score and determine whether the trends identified in Section 5.1 hold across diverse model architectures.

For this analysis, we employed the same magnitude score parameters as in Section 5.1. The results of our examination are illustrated in Figure 39, which showcases the magnitude scores for each model. One important observation is that the change in model architecture only affects the scale of the magnitude score, while the overall trend remains consistent across all models.

## T STATISTICAL REPORTS

In this section, we present detailed statistical reports for the experiments conducted in Section 5.1 and Section 4.2. These reports provide detailed information, including mean values and their corresponding 95% confidence intervals, to offer a thorough understanding of the experimental results.

Firstly, we focus on the experiment related to mitigating the magnitude score in Section 5.1. The results depicted in Figure 7 are presented in Table 8. Additionally, the outcomes illustrated in Figure 8 are reported in Table 9. For the ablation study of GHVB in Section 4.2, we provide the results shown in Figure 11 in Table 10 and report the findings in Figure 12 in Table 11.

Furthermore, we include a runtime comparison of each sampling method in Table 12, detailing the wall clock time required for each method. The results indicate that all the methods exhibit similar sampling times, ensuring a fair comparison across the different approaches.

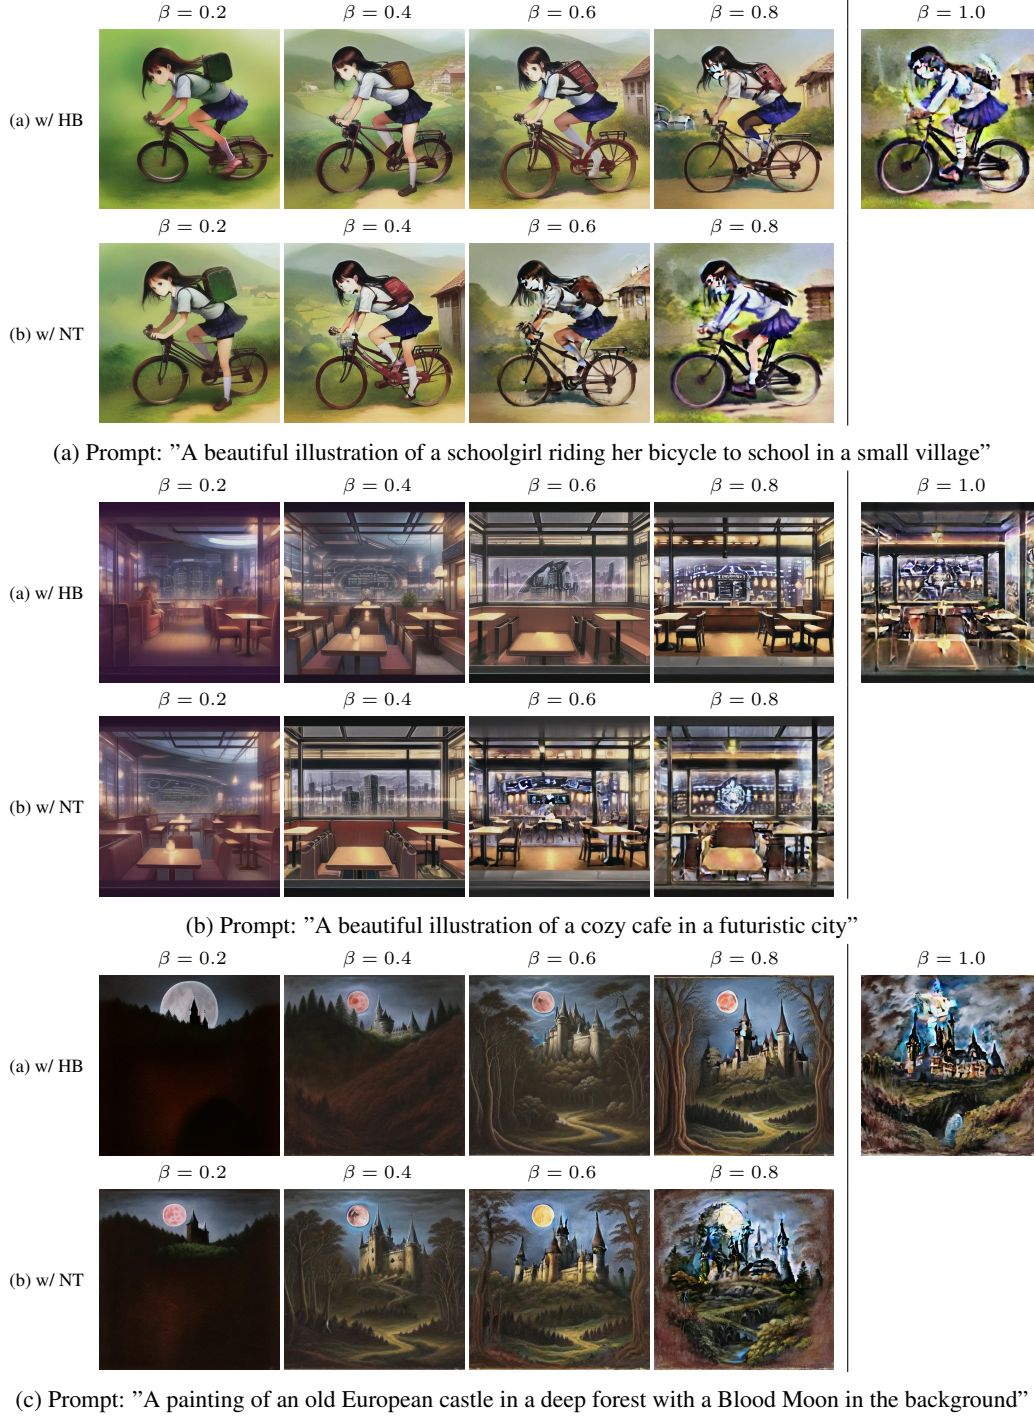

Figure 37: Comparison between two variations of momentum: (a) Polyak's Heavy Ball (HB) and (b) Nesterov (NT). These momentum variations are applied to PLMS4 (Liu et al., 2022a) on a fine-tuned Stable Diffusion model called Anything V4 with 15 sampling steps and a guidance scale of 15. Both variations effectively reduce artifacts. However, the choice of the effectiveness parameter  $\beta$  might differ due to the distinct shapes of their respective stability regions.

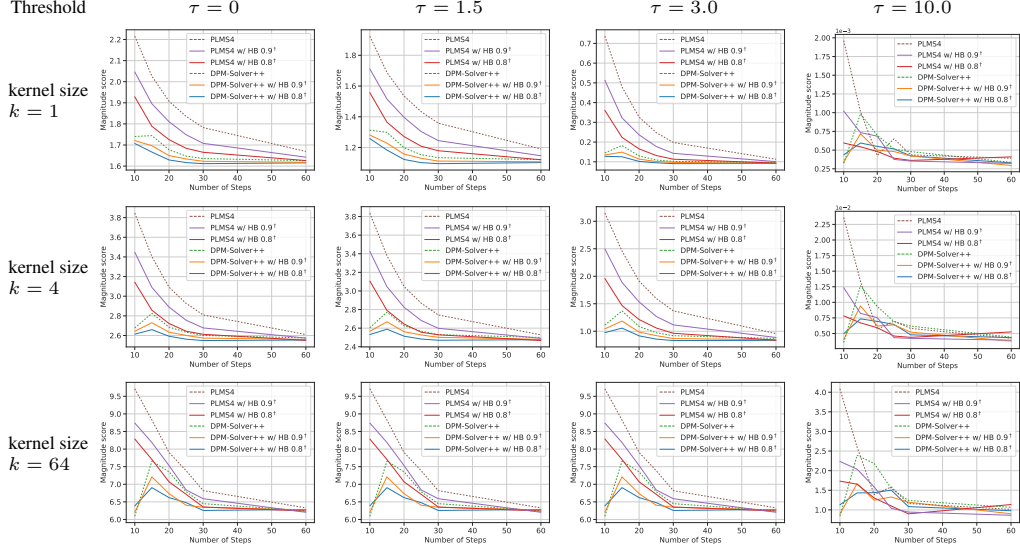

Figure 38: Comparison of magnitude scores on Anything V4 on different combinations of threshold  $\tau$  and kernel size  $k$  used in max-pooling. #samples = 160

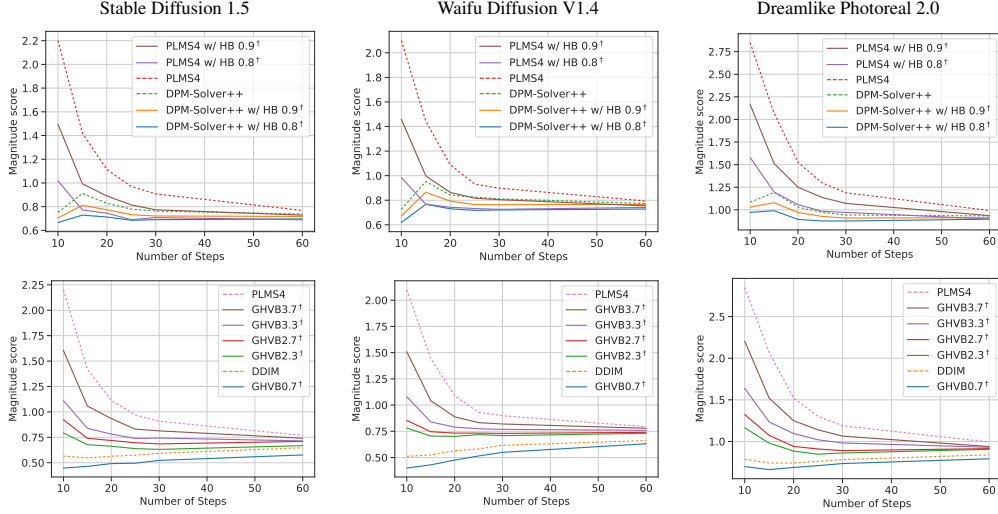

Figure 39: Comparison of magnitude scores in different diffusion models. #samples = 160

| Method          | Number of steps |              |              |              |              |              |
|-----------------|-----------------|--------------|--------------|--------------|--------------|--------------|
|                 | 10              | 15           | 20           | 25           | 30           | 60           |
| DPM             | 1.113 ± .090    | 1.369 ± .102 | 1.087 ± .083 | 0.972 ± .075 | 0.919 ± .068 | 0.869 ± .067 |
| DPM w/ HB 0.8   | 0.974 ± .078    | 1.057 ± .079 | 0.916 ± .072 | 0.857 ± .070 | 0.831 ± .067 | 0.834 ± .065 |
| DPM w/ HB 0.9   | 1.043 ± .082    | 1.186 ± .088 | 0.986 ± .075 | 0.921 ± .073 | 0.867 ± .068 | 0.844 ± .065 |
| PLMS4 w/ HB 0.8 | 1.958 ± .116    | 1.469 ± .105 | 1.213 ± .097 | 1.060 ± .087 | 0.963 ± .076 | 0.838 ± .063 |
| PLMS4 w/ HB 0.9 | 2.499 ± .118    | 1.888 ± .112 | 1.534 ± .112 | 1.270 ± .104 | 1.116 ± .091 | 0.887 ± .066 |
| PLMS4           | 3.149 ± .116    | 2.460 ± .116 | 1.911 ± .115 | 1.597 ± .116 | 1.372 ± .106 | 0.957 ± .075 |

Table 8: 95% confidence intervals for the magnitude scores of HB (Figure 7)

| Method  | Number of steps  |                  |                  |                  |                  |                  |
|---------|------------------|------------------|------------------|------------------|------------------|------------------|
|         | 10               | 15               | 20               | 25               | 30               | 60               |
| DDIM    | 0.844 $\pm$ .076 | 0.765 $\pm$ .064 | 0.728 $\pm$ .060 | 0.744 $\pm$ .063 | 0.761 $\pm$ .062 | 0.778 $\pm$ .062 |
| GHVB2.1 | 1.238 $\pm$ .097 | 0.924 $\pm$ .072 | 0.832 $\pm$ .067 | 0.820 $\pm$ .066 | 0.825 $\pm$ .066 | 0.829 $\pm$ .064 |
| GHVB2.3 | 1.291 $\pm$ .102 | 0.952 $\pm$ .072 | 0.872 $\pm$ .070 | 0.836 $\pm$ .064 | 0.831 $\pm$ .066 | 0.828 $\pm$ .062 |
| GHVB2.5 | 1.392 $\pm$ .103 | 1.016 $\pm$ .081 | 0.907 $\pm$ .071 | 0.851 $\pm$ .069 | 0.842 $\pm$ .065 | 0.845 $\pm$ .063 |
| GHVB2.7 | 1.514 $\pm$ .105 | 1.095 $\pm$ .085 | 0.968 $\pm$ .077 | 0.877 $\pm$ .068 | 0.864 $\pm$ .067 | 0.826 $\pm$ .063 |
| GHVB2.9 | 1.673 $\pm$ .107 | 1.203 $\pm$ .090 | 1.023 $\pm$ .079 | 0.934 $\pm$ .075 | 0.901 $\pm$ .071 | 0.835 $\pm$ .063 |
| PLMS4   | 3.149 $\pm$ .116 | 2.460 $\pm$ .116 | 1.911 $\pm$ .115 | 1.597 $\pm$ .116 | 1.372 $\pm$ .106 | 0.957 $\pm$ .075 |

Table 9: 95% confidence intervals for the magnitude scores of GHVB (Figure 8)

| Method  | Number of steps  |                  |                  |                  |                  |                  |                  |
|---------|------------------|------------------|------------------|------------------|------------------|------------------|------------------|
|         | 10               | 20               | 40               | 80               | 160              | 320              | 640              |
| DDIM    | 0.584 $\pm$ .034 | 0.409 $\pm$ .029 | 0.304 $\pm$ .029 | 0.210 $\pm$ .026 | 0.139 $\pm$ .022 | 0.085 $\pm$ .014 | 0.048 $\pm$ .009 |
| GHVB1.1 | 0.592 $\pm$ .034 | 0.406 $\pm$ .029 | 0.295 $\pm$ .030 | 0.189 $\pm$ .026 | 0.113 $\pm$ .020 | 0.054 $\pm$ .010 | 0.019 $\pm$ .005 |
| GHVB1.3 | 0.609 $\pm$ .035 | 0.410 $\pm$ .029 | 0.276 $\pm$ .029 | 0.158 $\pm$ .023 | 0.086 $\pm$ .017 | 0.030 $\pm$ .007 | 0.009 $\pm$ .003 |
| GHVB1.5 | 0.624 $\pm$ .036 | 0.409 $\pm$ .029 | 0.261 $\pm$ .029 | 0.145 $\pm$ .023 | 0.067 $\pm$ .014 | 0.021 $\pm$ .005 | 0.006 $\pm$ .002 |
| GHVB1.7 | 0.645 $\pm$ .037 | 0.411 $\pm$ .030 | 0.254 $\pm$ .028 | 0.133 $\pm$ .023 | 0.053 $\pm$ .011 | 0.016 $\pm$ .005 | 0.004 $\pm$ .002 |
| GHVB1.9 | 0.663 $\pm$ .037 | 0.414 $\pm$ .030 | 0.246 $\pm$ .028 | 0.123 $\pm$ .021 | 0.044 $\pm$ .009 | 0.013 $\pm$ .004 | 0.003 $\pm$ .001 |
| PLMS2   | 0.676 $\pm$ .038 | 0.418 $\pm$ .030 | 0.246 $\pm$ .028 | 0.119 $\pm$ .021 | 0.041 $\pm$ .009 | 0.011 $\pm$ .003 | 0.003 $\pm$ .001 |

Table 10: 95% confidence intervals for L2 norm of GHVB (Figure 11)

| Method  | Number of steps ( $k_{\text{new}}$ ) |                  |                  |                  |                  |
|---------|--------------------------------------|------------------|------------------|------------------|------------------|
|         | 40                                   | 80               | 160              | 320              | 640              |
| GHVB0.5 | 0.247 $\pm$ .030                     | 0.235 $\pm$ .029 | 0.351 $\pm$ .045 | 0.450 $\pm$ .057 | 0.474 $\pm$ .057 |
| GHVB1.5 | 0.550 $\pm$ .072                     | 0.717 $\pm$ .086 | 0.922 $\pm$ .089 | 1.337 $\pm$ .102 | 1.519 $\pm$ .102 |
| GHVB2.5 | 0.624 $\pm$ .077                     | 1.121 $\pm$ .115 | 1.546 $\pm$ .132 | 1.906 $\pm$ .153 | 1.846 $\pm$ .147 |
| GHVB3.5 | 0.459 $\pm$ .063                     | 0.920 $\pm$ .107 | 1.877 $\pm$ .170 | 1.960 $\pm$ .147 | 1.779 $\pm$ .163 |

Table 11: 95% confidence intervals for the numerical orders of convergence of GHVB (Figure 12)

| Method                 | Number of steps |      |      |
|------------------------|-----------------|------|------|
|                        | 15              | 30   | 60   |
| DPM-Solver++           | 2.49            | 4.84 | 9.54 |
| DPM-Solver++ w/ HB 0.9 | 2.49            | 4.84 | 9.54 |
| PLMS4                  | 2.49            | 4.84 | 9.54 |
| PLMS4 w/ HB 0.9        | 2.46            | 4.79 | 9.43 |
| PLMS4 w/ NT 0.9        | 2.53            | 4.93 | 9.70 |
| GHVB3.9                | 2.50            | 4.84 | 9.54 |

Table 12: Comparison of the average sampling time per image (in seconds) when using different numbers of steps in Stable Diffusion 1.5 on a single NVIDIA GeForce RTX 3080. The time differences are marginal.
